# Supplementary material for: Changing the narrative around obesity in the UK: a survey of people with obesity and healthcare professionals from the ACTION-IO study
Source: PubMed Central journal article supplement — BMJ Open. 2021 Jun 30;11(6):e045616. doi: 10.1136/bmjopen-2020-045616 (PMC8246368; doi:10.1136/bmjopen-2020-045616), 2021-06-30
Supplement: bmjopen-2020-045616.draft_revisions.pdf [file bmjopen-2020-045616.draft_revisions.pdf]

# BMJ Open

BMJ Open is committed to open peer review. As part of this commitment we make the peer review history of every article we publish publicly available.

When an article is published we post the peer reviewers' comments and the authors' responses online. We also post the versions of the paper that were used during peer review. These are the versions that the peer review comments apply to.

The versions of the paper that follow are the versions that were submitted during the peer review process. They are not the versions of record or the final published versions. They should not be cited or distributed as the published version of this manuscript.

BMJ Open is an open access journal and the full, final, typeset and author-corrected version of record of the manuscript is available on our site with no access controls, subscription charges or pay-per-view fees (<http://bmjopen.bmj.com>).

If you have any questions on BMJ Open's open peer review process please email [info.bmjopen@bmj.com](mailto:info.bmjopen@bmj.com)

# BMJ Open

## Changing the narrative around obesity in the UK: a survey of people with obesity and healthcare professionals from the ACTION-IO study

|                               |                                                                                                                                                                                                                                                                                                                                                                                                                                                                                                                                    |
|-------------------------------|------------------------------------------------------------------------------------------------------------------------------------------------------------------------------------------------------------------------------------------------------------------------------------------------------------------------------------------------------------------------------------------------------------------------------------------------------------------------------------------------------------------------------------|
| Journal:                      | <i>BMJ Open</i>                                                                                                                                                                                                                                                                                                                                                                                                                                                                                                                    |
| Manuscript ID                 | bmjopen-2020-045616                                                                                                                                                                                                                                                                                                                                                                                                                                                                                                                |
| Article Type:                 | Original research                                                                                                                                                                                                                                                                                                                                                                                                                                                                                                                  |
| Date Submitted by the Author: | 06-Oct-2020                                                                                                                                                                                                                                                                                                                                                                                                                                                                                                                        |
| Complete List of Authors:     | Hughes, Carly Anna; Fakenham Weight Management Service; University of East Anglia, Norwich Research Park<br>Ahern, Amy; MRC Epidemiology Unit, University of Cambridge<br>Kasetty, Harsha; Novo Nordisk Ltd<br>McGowan, Barbara; Guy's and St Thomas' NHS Foundation Trust, Institute of Diabetes, Endocrinology and Obesity<br>Parretti, Helen; University of East Anglia, Norwich Medical School<br>Vincent, Ann; University College London, Department of Medicine<br>Halford, Jason; University of Leeds, School of Psychology |
| Keywords:                     | GASTROENTEROLOGY, GENERAL MEDICINE (see Internal Medicine), General endocrinology < DIABETES & ENDOCRINOLOGY                                                                                                                                                                                                                                                                                                                                                                                                                       |
|                               |                                                                                                                                                                                                                                                                                                                                                                                                                                                                                                                                    |

SCHOLARONE™  
Manuscripts

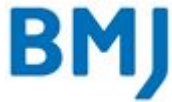

I, the Submitting Author has the right to grant and does grant on behalf of all authors of the Work (as defined in the below author licence), an exclusive licence and/or a non-exclusive licence for contributions from authors who are: i) UK Crown employees; ii) where BMJ has agreed a CC-BY licence shall apply, and/or iii) in accordance with the terms applicable for US Federal Government officers or employees acting as part of their official duties; on a worldwide, perpetual, irrevocable, royalty-free basis to BMJ Publishing Group Ltd ("BMJ") its licensees and where the relevant Journal is co-owned by BMJ to the co-owners of the Journal, to publish the Work in this journal and any other BMJ products and to exploit all rights, as set out in our [licence](#).

The Submitting Author accepts and understands that any supply made under these terms is made by BMJ to the Submitting Author unless you are acting as an employee on behalf of your employer or a postgraduate student of an affiliated institution which is paying any applicable article publishing charge ("APC") for Open Access articles. Where the Submitting Author wishes to make the Work available on an Open Access basis (and intends to pay the relevant APC), the terms of reuse of such Open Access shall be governed by a Creative Commons licence – details of these licences and which [Creative Commons](#) licence will apply to this Work are set out in our licence referred to above.

Other than as permitted in any relevant BMJ Author's Self Archiving Policies, I confirm this Work has not been accepted for publication elsewhere, is not being considered for publication elsewhere and does not duplicate material already published. I confirm all authors consent to publication of this Work and authorise the granting of this licence.

# Changing the narrative around obesity in the UK: a survey of people with obesity and healthcare professionals from the ACTION-IO study

Carly Hughes,<sup>2</sup> Amy Ahern,<sup>3</sup> Harsha Kasetty,<sup>4</sup> Barbara M McGowan,<sup>5</sup> Helen M Parretti,<sup>6</sup> Ann Vincent,<sup>7</sup> Jason CG Halford<sup>8</sup>

<sup>1</sup>Fakenham Weight Management Service, Fakenham Medical Practice, Fakenham, Norfolk, UK, NR21 8SY

<sup>2</sup>University of East Anglia, Norwich Research Park, Norwich, Norfolk, UK, NR4 7TJ

<sup>3</sup>MRC Epidemiology Unit, University of Cambridge, Cambridge, UK, CB2 0SL

<sup>4</sup>Novo Nordisk, Gatwick, UK, RH6 0PA

<sup>5</sup>Institute of Diabetes, Endocrinology and Obesity, Guy's and St Thomas' NHS Foundation Trust, London, UK, SE1 9RT and SE1 7EH

<sup>6</sup>Norwich Medical School, University of East Anglia, Norwich, Norfolk, UK, NR4 7TJ

<sup>7</sup>Department of Medicine, University College London, London, UK, WC1E 6DE

<sup>8</sup>School of Psychology, University of Leeds, West Yorkshire, UK, LS2 9JZ

Correspondence to:

**Name:** Carly Hughes

**Address:** Meditrinia House

Trinity Road

Fakenham

Norfolk NR21 8AS

United Kingdom

**Tel:** +44 1328 851 321

**Email:** carlyannahughes@gmail.com

**Word count:** 4050

**Keywords:** obesity, perceptions, attitudes, barriers, United Kingdom, ACTION-IO

## ABSTRACT

**Objectives:** To investigate the perceptions, attitudes, behaviours and potential barriers to effective obesity care in the UK using data collected from people with obesity (PwO) and healthcare professionals (HCPs) in the ACTION-IO study (NCT03584191).

**Design:** UK PwO (body mass index of  $\geq 30$  kg/m<sup>2</sup> based on self-reported height and weight) and HCPs who manage patients with obesity completed an online survey.

**Results:** In the UK, 1500 PwO and 306 HCPs completed the survey. Among the 47% of PwO who discussed weight with an HCP in the past 5 years, it took a mean of 9 years from the start of their struggles with weight until a discussion occurred. Most PwO (85%) assumed full responsibility for their own weight loss. The presence of obesity-related comorbidities was cited by 76% of HCPs as a top criterion for initiating weight management conversations. The perception of lack of interest (72%) and motivation (61%) in losing weight were reported as top reasons by HCPs for not discussing weight with a patient. Sixty-five percent of PwO liked their HCP bringing up weight during appointments. PwO reported complex and varied emotions following a weight loss conversation with an HCP, including supported (36%), hopeful (31%), motivated (23%), and embarrassed (17%). Follow-up appointments were scheduled for 19% of PwO after a weight discussion despite 62% wanting follow-up.

**Conclusions:** The current narrative around obesity requires a paradigm shift in the UK to address the delay between PwO struggling with their weight and discussing weight with their HCP. Perceptions of lack of patient interest and motivation in weight management must be challenged along with the blame culture of individual responsibility that is prevalent throughout society. While PwO may welcome weight-related conversations with an HCP, they evoke complex feelings, demonstrating the need for sensitivity and respect in these conversations.

**Trial registration:** ClinicalTrials.gov NCT03584191

## Strengths and limitations of this study:

- Strengths include the scientific rigour in the study design and implementation, the large number of UK PwO and HCP respondents and the ability to directly compare the UK data to the equivalent global dataset
- Limitations of this study include possible response bias from the population sampled and recall bias

For peer review only

## BACKGROUND

The causes of obesity are complex and multifaceted, encompassing biological, genetic, environmental, economic, social, and psychological factors.<sup>1-3</sup> The chronic and relapsing nature of obesity is associated with many serious physical and psychological comorbidities, reduced quality of life and increased healthcare costs.<sup>2 4-8</sup> The World Health Organization (WHO) has recognised obesity as a disease, and the National Institute for Health and Care Excellence (NICE) provides guidance on its assessment and treatment.<sup>9</sup> More recently it has been recognised as a risk factor for severity of COVID-19 infection.<sup>5 6</sup> The prevalence of overweight and obesity among adults in the UK has been increasing and was 63% in 2018.<sup>7</sup> This increase is thought to be primarily caused by people's latent biological susceptibility interacting with a changing environment that includes more sedentary lifestyles and increased dietary abundance.<sup>1</sup> The prevalence of adiposity in the UK population is approaching similar levels to those reported in the US (71%), Chile (74%), and Mexico (75%), which are among the highest recorded adult overweight and obesity levels in the world.<sup>8</sup> The number of people with obesity (PwO) in the UK continues to rise, and severe and complex obesity increased from fewer than 1% in 1993 to nearly 4% in 2017.<sup>10</sup> The UK-wide National Health Service (NHS) costs attributable to overweight and obesity are projected to reach £9.7 billion by 2050, with wider societal costs estimated to reach £49.9 billion per year.<sup>11</sup> The significant increase in the prevalence of obesity has not been matched by a proportionate expansion of continuing education on the biological basis and clinical management of obesity and training provision for healthcare professionals (HCPs), irrespective of their discipline.<sup>12</sup> Moreover, little effort has been made to address weight stigma and societal effects of weight bias, which continue to be experienced in a consistently negative way by those who have excess weight or obesity. Current evidence demonstrates that weight stigma is widespread in the UK,<sup>13</sup> that weight stigma is experienced in many settings,<sup>14 15</sup> and that experience of stigma is associated with negative

1  
2  
3 psychosocial outcomes, increased eating, reduced engagement with physical activity, and  
4 weight gain.<sup>16</sup>  
5  
6  
7

8  
9 The variability of causal pathways of weight gain is inherently unsuited to a 'one size fits all'  
10 treatment approach.<sup>1</sup> There is a range of existing guidance to support practice and care  
11 throughout the obesity care pathway in the UK.<sup>9 17</sup> However, the extent and range of the  
12 provision of weight management services is inconsistent and geographically dependent.<sup>18</sup> The  
13 obesity care pathway has an important role within the whole systems approach to tackling  
14 obesity, as outlined in the Foresight report,<sup>1</sup> and endorsed in the Department of Health and  
15 Social Care (DHSC) Call to Action<sup>19</sup> and the Public Health England paper on a whole systems  
16 approach to obesity.<sup>20</sup> The DHSC clinical policy outlines a tiered system of obesity care with a  
17 focus on public health and community advice in tier 1; primary care, community interventions  
18 and pharmacotherapy in tier 2; multi-disciplinary weight management service in tier 3; and  
19 secondary care and bariatric surgery in tier 4.<sup>21</sup>  
20  
21  
22  
23  
24  
25  
26  
27  
28  
29  
30  
31  
32  
33

34  
35 Despite its wide global prevalence, obesity remains poorly understood by the general public and  
36 HCPs, and this contributes to the high levels of stigma associated with obesity.<sup>22</sup> Society is  
37 continually informed through intense media coverage that obesity is simple and easily  
38 manipulated.<sup>23</sup> This attitude contributes to greater perceptions of individual responsibility,  
39 contrary to evidence that suggests that many factors outside of a person's control influence  
40 obesity.<sup>22 23</sup> To improve the quality and accessibility of obesity care, a better understanding of  
41 the disease and the gaps between current and optimal obesity management strategies is  
42 required. The Awareness, Care, and Treatment In Obesity maNagement – International  
43 Observation (ACTION-IO) study (NCT03584191) assessed the perceptions, attitudes, and  
44 behaviours of PwO and HCPs.<sup>24</sup> The global dataset<sup>24</sup> revealed a need to increase  
45 understanding of obesity and improve education concerning its aetiology. The aim of this sub-  
46  
47  
48  
49  
50  
51  
52  
53  
54  
55  
56  
57  
58  
59  
60



1  
2  
3 analysis was to identify the perceptions, attitudes, behaviours, and potential barriers to effective  
4 obesity care in the UK.  
5  
6  
7  
8

## 9 **METHODS**

### 10 **Study design and participants**

11  
12 The ACTION-IO study was a cross-sectional, non-interventional study that collected data via an  
13 online survey in Australia, Chile, Israel, Italy, Japan, Mexico, Saudi Arabia, South Korea, Spain,  
14 the UK, and the United Arab Emirates. The full methods for the ACTION-IO study have been  
15 reported previously.<sup>24</sup> Eligible PwO in the UK were 18 years or older, with a current BMI of at  
16 least 30 kg/m<sup>2</sup> based on self-reported height and weight. The PwO sample was targeted for  
17 demographic representativeness based on gender, age, income, race/ethnicity, and region.  
18 Therefore, PwO were excluded if they declined to provide any of these variables. Respondents  
19 were also excluded for non-obesity reasons for high BMI or dramatic weight loss, i.e. if they  
20 were pregnant, participated in intense fitness or body building programmes, or had significant,  
21 unintentional weight loss in the past 6 months. Eligible UK HCPs were in practice for 2 years or  
22 more, with at least 70% of their time spent in direct patient care, and who had seen 100 or more  
23 patients in the past month, at least 10 of whom had a BMI of at least 30 kg/m<sup>2</sup>. HCPs  
24 specialising in general, plastic, or bariatric surgery were excluded. Respondents were recruited  
25 via online panel companies (via e-mail) to whom they had given permission to be contacted for  
26 research purposes, and completed the survey in English. All respondents provided electronic  
27 informed consent prior to initiation of the screening questions and survey. Preceding  
28 participation, PwO were only informed of the purpose of the study, and were blinded to the  
29 specific study goals.  
30  
31  
32  
33  
34  
35  
36  
37  
38  
39  
40  
41  
42  
43  
44  
45  
46  
47  
48  
49  
50  
51  
52  
53  
54

### 55 **Survey development and procedures**

1  
2  
3 The study was designed by an international steering committee of obesity experts (representing  
4 primary care, endocrinology, and psychology, and including three medical doctors employed by  
5 Novo Nordisk), with support from KJT Group (Honeoye Falls, NY, US), and based on the  
6  
7 ACTION US and Canada questionnaires.<sup>25 26</sup> KJT Group managed the acquisition and analysis  
8  
9 of data; UK responses were collected between September and October 2018. Questionnaire  
10  
11 items were carefully phrased and presented in identical order for each respondent. Items in a  
12  
13 list were displayed in alphabetical, categorical, chronological, or random order as relevant for  
14  
15 each response. Respondents accessed the survey using a unique web link, details regarding  
16  
17 the digital fingerprinting system used to assess unique site visitors has been previously  
18  
19 described.<sup>24</sup> To prevent duplicate survey entries, unique site visitors were recorded via a user ID  
20  
21 that was passed along the unique web link that respondents used to access the site. The  
22  
23 system checked every respondent entering the survey against previous user IDs logged in its  
24  
25 database. Respondents who began the survey and suspended were able to re-enter the survey  
26  
27 while it was still open and finish the survey where they left off. Respondents who had already  
28  
29 received a terminal status (complete, over-quota, or terminate) were blocked from re-entering  
30  
31 the survey. Following closure of the survey, no users were able to gain access. The user ID and  
32  
33 data of suspended respondents were stored until the survey was closed and were then  
34  
35 eliminated from the data analysis. The study was conducted in accordance with the Guidelines  
36  
37 for Good Pharmacoepidemiology Practices<sup>27</sup> and is registered with ClinicalTrials.gov, number  
38  
39 NCT03584191.  
40  
41  
42  
43  
44  
45  
46

47 To ensure representativeness to the general population, the final PwO sample was weighted to  
48  
49 demographic targets within each country for age, gender, income, race/ethnicity, and region.  
50  
51 The HCP data were not weighted. Only data from those who completed the survey were  
52  
53 included in the analyses.  
54  
55  
56  
57  
58  
59  
60

## Patient and public involvement

No patients or members of the public were involved in the design or conduct of the study. A patient representative was involved in the analysis and interpretation of the UK data and is an author on this article. She will also be involved in disseminating these findings to a wider audience.

## RESULTS

### Demographics

A total of 69,676 PwO and 2,508 HCPs, in the UK, were invited. The response rate to the survey was 14% for PwO and 35% for HCPs, as expected for this type of study and in line with the target sample size.<sup>24</sup> Of those who responded to the survey, the eligibility rate was 22% for PwO and 53% for HCPs. The final UK sample for the ACTION-IO survey was 1500 PwO and 306 HCPs, of whom 156 were primary care professionals (PCPs) and 150 were secondary care professionals (SCPs) (table 1). Some differences were observed in the survey outcomes between PCPs and SCPs, which will be reported in full at a later date.

**Table 1** Sample demographics and characteristics

|                                                          | UK PwO<br>(n=1500) | HCPs<br>(n=306) |
|----------------------------------------------------------|--------------------|-----------------|
| Recruitment and qualification*                           |                    |                 |
| Total survey invitations sent                            | 69,676             | 2508            |
| Respondents                                              | 9786               | 886             |
| Respondents who qualified                                | 2146               | 387             |
| Respondents who qualified and completed validated survey | 1500               | 306             |
| Age, years (range)                                       | 55.7 (19–88)       | 48.9 (28–68)    |
| Gender, n (%)                                            |                    |                 |

|                                                       |             |             |
|-------------------------------------------------------|-------------|-------------|
| Male                                                  | 687 (45.8%) | 225 (73.5%) |
| Female                                                | 811 (54.1%) | 81 (26.5%)  |
| Other                                                 | 2 (0.1%)    | -           |
| BMI classification, n (%)                             |             |             |
| Respondents                                           | 1500 (100%) | 236 (77.1%) |
| Underweight or healthy range (<25 kg/m <sup>2</sup> ) | -           | 152 (64.4%) |
| Overweight (25–29.9 kg/m <sup>2</sup> )               | -           | 72 (30.5%)  |
| Obesity Class I (30–34.9 kg/m <sup>2</sup> )          | 883 (56.2%) | 7 (3.0%)    |
| Obesity Class II (35–39.9 kg/m <sup>2</sup> )         | 333 (22.4%) | 2 (0.9%)    |
| Obesity Class III (≥40 kg/m <sup>2</sup> )            | 284 (21.4%) | 3 (1.3%)    |
| Number of comorbidities, n (%)                        |             |             |
| 0                                                     | 264 (16.9%) | -           |
| 1                                                     | 360 (25.0%) | -           |
| 2                                                     | 330 (22.2%) | -           |
| 3                                                     | 257 (16.0%) | -           |
| ≥4                                                    | 289 (20.0%) | -           |
| HCP category, n (%)                                   |             |             |
| PCP                                                   | -           | 156 (51.0%) |
| SCP                                                   | -           | 150 (49.1%) |
| Endocrinologist                                       | -           | 43 (14.1%)  |
| Cardiologist                                          | -           | 51 (16.7%)  |
| Obstetrician-gynaecologist                            | -           | 16 (5.2%)   |
| Other                                                 | -           | 40 (13.1%)  |
| Obesity specialist, <sup>†</sup> n (%)                |             |             |
| Yes                                                   | -           | 162 (52.9%) |
| No                                                    | -           | 144 (47.1%) |

All N sizes for PwO are from unweighted data. Demographic percentages (age, gender) are also from unweighted data. All non-demographic percentage results are for PwO weighted data. HCP data were not weighted, therefore N sizes and percentages are all unweighted data.

\*Participation rate (those who completed the screener) was 99.9% for PwO and 84.7% for HCPs; completion rate was 100% for PwO and 85.8% for HCPs.

1  
2  
3 †A physician who meets at least one of the following criteria: at least 50% of their patients are seen for obesity/weight  
4 management; or has advanced/formal training in treatment of obesity/weight management beyond medical school; or  
5 considers themselves to be an expert in obesity/weight loss management, or works in an obesity service clinic.  
6  
7

8 BMI, body mass index; HCP, healthcare professional; PCP, primary care professional; PwO, people with obesity;  
9 SCP, secondary care professional.  
10  
11  
12  
13  
14

## 15 **Pre-consultation and initiation of weight management discussion**

### 16 **People with obesity**

17  
18 Only about half (47%) of all PwO had discussed excess weight or losing weight with an HCP in  
19 the past 5 years. It took a median of 6 years and mean of 9 years (range 0.0–56.0 years;  
20 interquartile range 13) between the time when PwO said they first started struggling with excess  
21 weight or obesity and when they first had a weight management conversation with an HCP  
22 (figure 1A). In comparison, globally it took a median of 3 years and mean of 6 years (range 0.0–  
23 68.0 years; interquartile range 8 [figure 1A]).<sup>24</sup> Forty-seven percent of PwO who discussed  
24 weight with an HCP reported that they initiated the conversation themselves. When PwO were  
25 asked to name the top five reasons why they may not discuss weight management with their  
26 HCP, the most common reason was the belief that it was their own responsibility to manage  
27 their weight (51% of PwO) (figure 1B). Indeed, when asked whether they agreed with the  
28 statement “my weight loss is completely my responsibility”, 85% of PwO agreed with the  
29 statement. Thirty-four percent of PwO said that they were motivated to lose weight, and 36%  
30 provided a neutral response (neither agreed nor disagreed that they were motivated). Only 4%  
31 of PwO reported an indifference to losing weight as a reason for not discussing managing their  
32 weight with an HCP. Sixty-five percent of PwO who had previously had a weight conversation  
33 with their HCP liked that their HCP discussed their weight with them, and 58% who had not  
34 previously had a conversation would have liked their HCP to bring up weight during their  
35 appointments. Most PwO (81%) believed that obesity has a large impact on overall health,  
36  
37  
38  
39  
40  
41  
42  
43  
44  
45  
46  
47  
48  
49  
50  
51  
52  
53  
54  
55  
56  
57  
58  
59  
60

1  
2  
3 similar to other chronic diseases such as diabetes (82%), stroke (88%), cancer (82%), or  
4 chronic obstructive pulmonary disease (COPD [84%]). The internet was cited as a source of  
5 information used by 31% of PwO for managing weight (figure 2A). Other sources of information  
6  
7 were reported as family and friends (27%), weight loss programmes (26%), information from an  
8  
9 HCP (23%), and media (books/magazines 21%, television programmes 20%) (figure 2A).  
10  
11  
12  
13  
14  
15

### 16 Healthcare professionals

17  
18 Those HCPs who discussed weight with their patients reported that 35% of the time the patient  
19 initiated the conversation. Compared with PwO (85%), a smaller proportion of HCPs (33%)  
20 placed the responsibility for weight loss on PwO. Only 13% of HCPs thought their patients were  
21 motivated to lose weight, and 42% provided a neutral response (neither agreed nor disagreed  
22 that their patients were motivated). The most commonly selected reason for not discussing  
23 weight management with a patient (selected by 72% of HCPs) was the perception that the  
24 patient was not interested in losing weight, and 61% of HCPs selected lack of patient motivation  
25 (figure 1C). Other reasons provided for not discussing obesity with a patient were that the  
26 appointments were not long enough and that they felt rushed (selected by 68% of HCPs), and  
27 that more important health issues/concerns were an impediment to discussing obesity with a  
28 patient (selected by 58% of HCPs). In addition, almost one third of HCPs (31%) reported that  
29 the good health of a patient and absence of weight-related comorbidities would be a reason for  
30 not discussing weight management. The most important criterion for initiating weight  
31 management conversations with a patient was the presence of obesity-related comorbidities,  
32 cited by 76% of HCPs. Only 68% of UK HCPs (vs 76% of global HCPs<sup>24</sup>) recognised the impact  
33 of obesity on health, and it was rated as less serious than diabetes, cancer, stroke, or COPD by  
34 40%, 65%, 62%, and 43% of UK HCPs, respectively.  
35  
36  
37  
38  
39  
40  
41  
42  
43  
44  
45  
46  
47  
48  
49  
50  
51  
52  
53  
54  
55

### 56 Consultation

## People with obesity

Eighty-one percent of the PwO who had discussed weight with an HCP had had a discussion with a PCP, 42% with a nurse, 18% with a dietitian/nutritionist, and 17% with a diabetes educator. PwO reported a complex mixture of feelings following a weight loss conversation with an HCP (figure 2B). PwO cited a combination of feelings such as supported 36%, hopeful 31%, motivated 23%, embarrassed 17%, indifferent 16%, discouraged 11%, relieved 10%, blamed 10%, rushed 10%, offended 4%, and confused 4% (figure 2B).

## Healthcare professionals

Fifty-nine percent of HCPs reported that they were extremely or very comfortable discussing weight, 30% were neither comfortable nor uncomfortable, and 11% were a little or not at all comfortable discussing weight. On average, HCPs reported that they spent 10 minutes interacting with their patients when discussing weight (range 1–20 minutes).

## Consultation outcomes and follow-up

### People with obesity

Among the 47% of PwO who had discussed their weight with an HCP in the past 5 years, 49% reported that they had been diagnosed with obesity in the past by an HCP (24% of all PwO, figure 3). Only 19% of PwO who had discussed their weight with an HCP had a follow-up appointment scheduled (9% of all PwO) (figure 3). However, 62% of PwO would have liked a follow-up appointment and 96% reported attending or planning to attend a follow-up appointment if scheduled. The most frequent methods for managing weight tried by PwO were general improvements in eating habits/reducing calories (reported by 61% of PwO) and general increases in physical activity (55%), which were reported at a greater frequency than by global PwO (51% and 39% for general eating habits and physical activity, respectively; ACTION-IO study steering committee, personal communication). Bariatric surgery and behavioural therapy

1  
2  
3 referral rates were reported in small numbers by UK PwO (1% and 2%, respectively). Visits to a  
4  
5 nutritionist/dietician and obesity specialist were reported less frequently by UK PwO than global  
6  
7 PwO (nutritionist/dietician: 11% UK, 24% global; obesity specialist: 2% UK, 9% global; ACTION-  
8  
9 IO study steering committee, personal communication).  
10

### 11 12 13 Healthcare professionals

14  
15 On average, HCPs scheduled follow-up appointments with 33% of their patients for obesity and  
16  
17 46% of HCPs said patients kept these follow-up appointments always or most of the time. HCPs  
18  
19 most frequently recommended general improvements in eating habits/reducing calories  
20  
21 (reported by 61% of HCPs) and general increases in physical activity (65%). Referrals to obesity  
22  
23 specialists were recommended less frequently by UK HCPs (12%) compared with the global  
24  
25 dataset (23%).<sup>24</sup>  
26  
27  
28  
29  
30

## 31 32 DISCUSSION

33  
34 PwO are faced with biological predispositions, and societal and environmental conditions that  
35  
36 contribute to obesity, weight stigma, and discrimination. Obesity prevention and management  
37  
38 are key health priorities and require a whole systems approach. However, the national response  
39  
40 for obesity focuses on individual responsibility regarding nutrition and lack of physical activity. In  
41  
42 this study, multiple barriers to effective weight management were identified, which are  
43  
44 summarised in figure 4 and discussed below.  
45  
46  
47  
48

### 49 50 **Initiation of weight management discussion with healthcare professionals**

51  
52 Fewer than half of PwO in the UK (47%) had a discussion with an HCP about their weight in the  
53  
54 past 5 years,<sup>24</sup> despite HCPs being the gateway to weight management care in the NHS.  
55  
56  
57  
58



1  
2  
3 Moreover, for the PwO who did have a weight discussion, it took a mean of 9 years after they  
4 first started struggling with their weight before having the discussion (compared with 6 years  
5 globally).<sup>24</sup> This delay is particularly important as it may create an opportunity for significant  
6 obesity-related complications to develop. Reducing the time gap by initiating earlier weight  
7 management discussions may be an effective strategy for improving obesity treatment and  
8 preventing the development of comorbidities.  
9  
10  
11  
12  
13  
14

15  
16  
17  
18 From the PwO perspective, a delay in seeking help could be linked to the high percentage  
19 (85%) of PwO who perceived their weight loss as completely their responsibility. From the HCP  
20 perspective, a delay in discussing obesity with a patient could be linked to reported perceptions  
21 that the patient was not interested or motivated in losing weight, consistent with previous  
22 research.<sup>28 29</sup> Other impediments to the discussion were HCPs' views that there were more  
23 important health issues to discuss and that a weight management discussion is only required  
24 when weight-related comorbidities are present, as supported by other studies.<sup>29 30</sup> Moreover,  
25 HCPs in the UK underestimated the effect of obesity on health to a greater extent than UK PwO  
26 and global HCPs.<sup>24</sup> For PwO this will likely require a change in the narrative around obesity to  
27 lessen focus on individual responsibility, and for HCPs a need to increase the understanding of  
28 the health consequences of obesity and the desire of PwO for help and support. The internet,  
29 media, and family and friends formed a substantial source of information for PwO for managing  
30 weight. We need to change this from personal responsibility to recognising the aetiology of  
31 obesity and its implications for PwO.  
32  
33  
34  
35  
36  
37  
38  
39  
40  
41  
42  
43  
44  
45  
46  
47  
48  
49

## 50 **Consultation**

51 Primary care is the gateway to obesity treatment, and most weight management discussions  
52 were held with a primary care physician or nurse. While many PwO welcomed weight  
53 discussions with HCPs, they also reported experiencing complex and varied emotions after  
54  
55  
56  
57  
58  
59  
60

1  
2  
3 these discussions. It is important to acknowledge the complexity of the experience for PwO.  
4  
5 Studies have previously reported patients feeling that their obesity had been ignored, dismissed,  
6  
7 distorted, or attributed as the explanation of all their health problems by HCPs.<sup>31-33</sup> Negative  
8  
9 experiences can contribute to depression, anxiety, low self-esteem, and body dissatisfaction.<sup>34</sup>  
10  
11 <sup>35</sup> Dissatisfactory conversations with an HCP may discourage PwO from seeking further weight  
12  
13 management help in the future and reinforce feelings of personal responsibility for weight  
14  
15 management. The attitudes of health professionals towards obesity and its management have  
16  
17 been generally reported to be negative, and knowledge and skills in managing obesity have  
18  
19 been noted to be inconsistent.<sup>36-41</sup> Even well-intended acts can cause offence and humiliation,<sup>42</sup>  
20  
21 and PwO often experience their weight in profoundly negative ways as a result of the pervasive  
22  
23 stigmatisation of obesity. Patient experiences are valid indications of the strengths and  
24  
25 shortcomings of the services they receive.<sup>43</sup> It is important to ensure that the narrative around  
26  
27 obesity resonates with the lived experiences of those affected by it and encourages patients to  
28  
29 engage with an HCP.<sup>43</sup> HCPs in turn should aim to provide compassionate care that is free of  
30  
31 bias and use supportive communication and language to facilitate successful and meaningful  
32  
33 conversations.<sup>43</sup>  
34  
35  
36  
37  
38

39 HCPs often have limited time and resources, and lack of time has previously been reported as a  
40  
41 barrier to discussing obesity.<sup>44 45</sup> More HCPs in the UK (68%) than globally (54%) indicated that  
42  
43 the limited appointment time would be a factor in not having a weight loss conversation.<sup>24</sup> This  
44  
45 may be a reflection of the average primary care consultation time in the UK, which is 10 minutes  
46  
47 and considerably shorter than in many other countries.<sup>46 47</sup> Other potential barriers described in  
48  
49 the literature have included uncertainty about appropriate language,<sup>44</sup> concerns about  
50  
51 compromising rapport,<sup>9</sup> and concerns discussing a potentially upsetting and stigmatising topic.<sup>22</sup>  
52  
53 <sup>46 48</sup> However, in this study relatively few HCPs reported discomfort with weight discussions.  
54  
55  
56  
57  
58  
59  
60

### Consultation outcomes and follow-up

Obesity diagnoses, follow-up appointments, and referrals to specialists were infrequently reported by PwO, which could incorrectly reinforce the feeling of individual responsibility. Indeed, methods for managing weight reported by PwO, which relied largely on general improvements in eating habits and physical activity, suggest a lack of knowledge of effective treatment methods and/or a consequence of the availability of therapeutic options (see below).

The data from HCPs on the frequency of follow-up appointments and methods for obesity management largely aligned with the data from PwO. Barriers to effective weight management cited in the literature have included lack of effective and individualised treatment and/or referral options.<sup>36 37 46 49</sup> Weight management services in the UK exist as part of fragmented health and social care systems, which are geographically dependent.<sup>45 50 51</sup> The range of services and treatments, including pharmacotherapy and bariatric surgery, is limited in the UK, which may restrict HCPs in what they can offer patients. Indeed, HCPs report insufficient management options and skepticism about their efficacy.<sup>52 53</sup> The limited availability of weight management services, effective treatments and coherent, joined-up strategies in the UK health system are significant barriers to providing effective obesity care.<sup>51</sup>

### Strengths and limitations

Strengths of this study include scientific rigour in the study design (including carefully phrased and ordered questions to prevent biased responses, blinded purpose of the survey for PwO, and determination of eligibility by initial screening questions to eradicate bias during recruitment) and implementation (including stratified sampling to provide a representative cohort of the general population and rigorous data analysis). Other strengths include the large number of UK PwO and HCP respondents and the ability to directly compare the UK data to the equivalent global dataset. Limitations include the cross-sectional design and reliance on accurate reporting

1  
2  
3 from the PwO and HCP respondents, which could be perceived as recall bias. The self-reported  
4 height and weight could underestimate the BMI of the PwO. The low response rates could affect  
5 sample representativeness and is a known limitation for this type of study. Response bias from  
6 the population sampled cannot be ruled out. However, the PwO sample was representative of  
7 the demographics of the general population.  
8  
9  
10  
11  
12  
13  
14  
15

## 16 **Conclusion**

17 This study demonstrates the need to change the narrative around obesity, with less stigmatising  
18 focus on individual responsibility, for the government, commissioners, general public, PwO, and  
19 HCPs. The findings identified areas that prevent PwO from seeking help and receiving  
20 appropriate care. In addition, the attitudes of HCPs prevent them from offering the support PwO  
21 require for obesity management. The consultation about weight with an HCP is the gateway to  
22 treatment in the NHS and improving the frequency and quality of PwO–HCP conversations is  
23 essential. Sufficient time should be given to HCPs to approach the topic of overweight and  
24 obesity sensitively and effectively. The current survey did not have high numbers of people with  
25 a BMI of over 40 kg/m<sup>2</sup>; further research is required to understand whether people with higher  
26 BMIs have distinct experiences in the management of their obesity.  
27  
28  
29  
30  
31  
32  
33  
34  
35  
36  
37  
38  
39  
40  
41

42 To conclude, a whole systems approach is required to address and eliminate weight bias and  
43 stigmatisation, to change the narrative around obesity in the UK, and to improve provision of  
44 NHS services. Educating the whole population, including PwO and HCPs, about the aetiology  
45 and psychology of obesity and the interaction with the obesogenic environment should help to  
46 ensure that patients access and receive quality care and effective weight treatment and  
47 management. Changing the narrative around obesity will allow for a more effective delivery  
48  
49  
50  
51  
52  
53  
54  
55  
56  
57  
58  
59  
60

1  
2  
3  
4  
5  
6  
7  
8  
9  
10  
11  
12  
13  
14  
15  
16  
17  
18  
19  
20  
21  
22  
23  
24  
25  
26  
27  
28  
29  
30  
31  
32  
33  
34  
35  
36  
37  
38  
39  
40  
41  
42  
43  
44  
45  
46  
47  
48  
49  
50  
51  
52  
53  
54  
55  
56  
57  
58  
59  
60

framework for health service providers and greater access to effective treatment pathways and weight management services for PwO.

For peer review only

## Contributors

CH and JH are members of the ACTION-IO study steering committee and contributed to the design of the study. All authors participated in interpretation of the data, and drafting and revision of the manuscript. All authors reviewed and approved the final, submitted version.

## Funding

This work and ACTION-IO was supported by Novo Nordisk.

## Competing interests

CH reports financial support from Novo Nordisk to attend an obesity conference during the conduct of the study, grants from the Rona Marsden Fund at Fakenham Medical Practice, and personal fees from Orexigen Therapeutics, Consilient Health, Nestlé, Ethicon, and Alva outside the submitted work. AA reports grants from UKRI Medical Research Council and National Institute for Health Research, and non-financial support from WW (formerly Weight Watchers). HK is an employee of Novo Nordisk and owns shares in Novo Nordisk. BMM reports grants paid to her institution from Novo Nordisk and personal fees (consultancy and advisory board) from Novo Nordisk, Boehringer Ingelheim, and Orexigen Therapeutics. BMM has received speaker fees for Eli Lilly, Novo Nordisk, Boehringer Ingelheim, Janssen, MSD, and Sanofi. HMP reports grants from the National Institute for Health Research and Public Health England. AV acted as a speaker for Obesity Empowerment Network and is a board member of the Clinical Advisory Committee on the All Wales Obesity Strategy. JCGH reports fees (honoraria) paid to the University of Liverpool from Novo Nordisk, Orexigen, and Boehringer Ingelheim during the conduct of the study.

## Ethics approval

The National Health Service Health Research Authority (London – Central Research Ethics Committee) advised that ethical approval was not needed in the UK.

## Transparency statement

CH affirms that the manuscript is an honest, accurate, and transparent account of the study being reported; that no important aspects of the study have been omitted; and that any discrepancies from the study as originally planned have been explained.

## Data sharing

Deidentified participant data will be made available for this Article on a specialised SAS data platform. Datasets from Novo Nordisk will be available permanently after completion of data analysis. Access to data can be made through a request proposal form and the access criteria can be found online ([novonordisk-trials.com](http://novonordisk-trials.com)). Data will be shared with bona fide researchers submitting a research proposal requesting access to data. Data use is subject to approval by the Independent Review Board.

## Dissemination declaration

Dissemination of the results to study participants and/or patient organisations is not applicable for this non-interventional, survey study.

## Acknowledgements

1  
2  
3 We thank the participants of the study. Medical editorial assistance was provided by Anna  
4  
5 Bacon from Articulate Science, Ltd, and was funded by Novo Nordisk.  
6  
7  
8  
9  
10  
11  
12  
13  
14  
15  
16  
17  
18  
19  
20  
21  
22  
23  
24  
25  
26  
27  
28  
29  
30  
31  
32  
33  
34  
35  
36  
37  
38  
39  
40  
41  
42  
43  
44  
45  
46  
47  
48  
49  
50  
51  
52  
53  
54  
55  
56  
57  
58  
59  
60

For peer review only



## TABLE AND FIGURE LEGENDS

**Table 1** Sample demographics and characteristics.

**Figure 1** Number of years between when struggle with weight began and first discussed with an HCP and PwO/HCP reasons for not discussing weight management. **(A)** Approximate number of years reported by UK and global PwO (ACTION-IO study steering committee, personal communication) between the beginning of their struggle with weight and first discussion with an HCP. Calculated at respondent level from questions “Approximately how old were you when you first remember struggling with excess weight or obesity?” and “Approximately how old were you when a healthcare provider first discussed your excess weight or recommended that you lose weight?”. **(B)** Reasons reported by UK PwO for not discussing managing their weight with an HCP. **(C)** Reasons reported by UK HCPs for not discussing weight management with their patients.

HCP, healthcare professional; PwO, people with obesity.

**Figure 2** Sources of information and feelings after a weight discussion. **(A)** Sources of information most frequently used by UK PwO for managing weight (reported by PwO). **(B)** Feelings reported by UK PwO after their most recent weight or weight loss discussion with an HCP in the past 5 years.

HCP, healthcare professional; PwO, people with obesity.

**Figure 3** Obesity diagnoses and follow-up appointments with an HCP. Proportion of UK PwO who discussed weight or weight loss with an HCP in the past 5 years and the frequency of obesity diagnoses and follow-up appointments.

HCP, healthcare professional; PwO, people with obesity.

1  
2  
3  
4  
5 **Figure 4** A conceptual model of the obesity treatment pathway and barriers to obesity care in  
6 the UK.

7  
8 BMI, body mass index; HCP, healthcare professional; PwO, people with obesity.  
9  
10  
11  
12  
13  
14  
15  
16  
17  
18  
19  
20  
21  
22  
23  
24  
25  
26  
27  
28  
29  
30  
31  
32  
33  
34  
35  
36  
37  
38  
39  
40  
41  
42  
43  
44  
45  
46  
47  
48  
49  
50  
51  
52  
53  
54  
55  
56  
57  
58  
59  
60

For peer review only

## References

1. Foresight. Tackling obesities: future choices. 2007. <https://www.gov.uk/government/collections/tackling-obesities-future-choices> [Accessed 15 January 2020].
2. Bray GA, Kim KK, Wilding JPH, World Obesity Federation. Obesity: a chronic relapsing progressive disease process. A position statement of the World Obesity Federation. *Obes Rev* 2017;18:715–23. doi: 10.1111/obr.12551
3. Ralston J, Brinsden H, Buse K, *et al*. Time for a new obesity narrative. *Lancet* 2018;392:1384–86. doi: 10.1016/s0140-6736(18)32537-6
4. Ghanemi A, Yoshioka M, St-Amand J. Broken energy homeostasis and obesity pathogenesis: the surrounding concepts. *J Clin Med* 2018;7:453. doi: 10.3390/jcm7110453
5. Kassir R. Risk of COVID-19 for patients with obesity. *Obes Rev* 2020;21:e13034. doi: 10.1111/obr.13034
6. Garg S, Kim L, Whitaker M, *et al*. Hospitalization rates and characteristics of patients hospitalized with laboratory-confirmed coronavirus disease 2019 — COVID-NET, 14 states, March 1–30, 2020. *MMWR Morb Mortal Wkly Rep* 2020;69:458–64.
7. NHS Digital. Health Survey for England 2018. Overweight and obesity in adults and children. <http://healthsurvey.hscic.gov.uk/media/81625/HSE18-Adult-Child-Obesity-rep.pdf> [Accessed June 2020].
8. The Organization for Economic Cooperation and Development (OECD). Overweight or obese population (indicator). 2019. <https://data.oecd.org/healthrisk/overweight-or-obese-population.htm> [Accessed June 2020].
9. National Institute of Health and Care Excellence (NICE). Obesity: identification, assessment and management. 2014. <https://www.nice.org.uk/guidance/cg189/resources/obesity-identification-assessment-andmanagement-pdf-35109821097925> [Accessed 28 November 2019].
10. NHS Digital. Statistics on Obesity, Physical Activity and Diet, England, 2019. <https://digital.nhs.uk/data-and-information/publications/statistical/statistics-on-obesity-physical-activity-and-diet/statistics-on-obesity-physical-activity-and-diet-england-2019/part-3-adult-obesity> [Accessed 2 December 2019].
11. Public Health England. Health matters: obesity and the food environment. 2017. <https://www.gov.uk/government/publications/health-matters-obesity-and-the-food-environment/health-matters-obesity-and-the-food-environment--2> [Accessed April 2020].
12. Royal College of Physicians. The training of health professionals for the prevention and treatment of overweight and obesity 2010. <https://www.rcplondon.ac.uk/news/rcp-report-concludes-all-health-professionals-need-obesity-training> [Accessed 3 December 2019].
13. Flint SW, Hudson J, Lavalley D. UK adults' implicit and explicit attitudes towards obesity: a cross-sectional study. *BMC Obes* 2015;2:31. doi: 10.1186/s40608-015-0064-2
14. Flint SW, Čadek M, Codreanu SC, *et al*. Obesity discrimination in the recruitment process: "you're not hired!". *Front Psychol* 2016;7:647. doi: 10.3389/fpsyg.2016.00647

15. Flint SW, Reale S. Weight stigma in frequent exercisers: Overt, demeaning and condescending. *J Health Psychol* 2018;23:710–19. doi: 10.1177/1359105316656232
16. Vartanian LR, Novak SA. Internalized societal attitudes moderate the impact of weight stigma on avoidance of exercise. *Obesity (Silver Spring)* 2011;19:757–62. doi: 10.1038/oby.2010.234
17. Department of Health, Obesity and Food Policy Branch. Developing a specification for lifestyle weight management services. Best practice guidance for tier 2 services. 2013. [https://assets.publishing.service.gov.uk/government/uploads/system/uploads/attachment\\_data/file/142723/Weight\\_Management\\_Service\\_Spec\\_FINAL\\_with\\_IRB.pdf](https://assets.publishing.service.gov.uk/government/uploads/system/uploads/attachment_data/file/142723/Weight_Management_Service_Spec_FINAL_with_IRB.pdf) [Accessed April 2020].
18. Public Health England. National mapping of weight management services: provision of tier 2 and tier 3 services in England. 2015. [https://assets.publishing.service.gov.uk/government/uploads/system/uploads/attachment\\_data/file/484115/Final\\_Weight\\_Management\\_Mapping\\_Report.pdf](https://assets.publishing.service.gov.uk/government/uploads/system/uploads/attachment_data/file/484115/Final_Weight_Management_Mapping_Report.pdf) [Accessed 17 January 2020].
19. Department of Health and Social Care. Healthy Lives, Healthy People: A Call to Action on Obesity in England. 2011. <https://www.gov.uk/government/publications/healthy-lives-healthy-people-a-call-to-action-on-obesity-in-england> [Accessed April 2020].
20. Public Health England. Whole systems approach to obesity. A guide to support local approaches to promoting a healthy weight. 2019. [https://assets.publishing.service.gov.uk/government/uploads/system/uploads/attachment\\_data/file/820783/Whole\\_systems\\_approach\\_to\\_obesity\\_guide.pdf](https://assets.publishing.service.gov.uk/government/uploads/system/uploads/attachment_data/file/820783/Whole_systems_approach_to_obesity_guide.pdf) [Accessed June 2020].
21. Public Health England and NHS England. Report of the working group into: Joined up clinical pathways for obesity. 2014. <https://www.england.nhs.uk/wp-content/uploads/2014/03/owg-join-clinc-path.pdf> [Accessed April 2020].
22. Puhl RM, Heuer CA. Obesity stigma: important considerations for public health. *Am J Public Health* 2010;100:1019–28. doi: 10.2105/AJPH.2009.159491
23. Stanford FC, Tauqeer Z, Kyle TK. Media and its influence on obesity. *Curr Obes Rep* 2018;7:186–92. doi: 10.1007/s13679-018-0304-0
24. Caterson ID, Alfadda AA, Auerbach P, *et al.* Gaps to bridge: misalignment between perception, reality and actions in obesity. *Diabetes Obes Metab* 2019;21:1914–24. doi: 10.1111/dom.13752
25. Kaplan LM, Golden A, Jinnett K, *et al.* Perceptions of barriers to effective obesity care: results from the national ACTION study. *Obesity (Silver Spring)* 2018;26:61–9. doi: 10.1002/oby.22054
26. Sharma AM, Bélanger A, Carson V, *et al.* Perceptions of barriers to effective obesity management in Canada: results from the ACTION study. *Clin Obes* 2019;9:e12329. doi: 10.1111/cob.12329
27. International Society for Pharmacoepidemiology (ISPE). Guidelines for Good Pharmacoepidemiology Practices (GPP). <https://www.pharmacoepi.org/resources/policies/guidelines-08027/> [Accessed 15 January 2020].

- 1
- 2
- 3
- 4 28. Visser F, Hiddink G, Koelen M, *et al.* Longitudinal changes in GPs' task perceptions, self-
- 5 efficacy, barriers and practices of nutrition education and treatment of overweight. *Fam*
- 6 *Pract* 2008;25 Suppl 1:i105–11. doi: 10.1093/fampra/cmn078
- 7
- 8 29. Tham M, Young D. The role of the General Practitioner in weight management in primary
- 9 care--a cross sectional study in general practice. *BMC Fam Pract* 2008;9:66.
- 10 doi: 10.1186/1471-2296-9-66
- 11
- 12 30. Scott JG, Cohen D, DiCicco-Bloom B, *et al.* Speaking of weight: how patients and primary
- 13 care clinicians initiate weight loss counseling. *Prev Med* 2004;38:819–27.
- 14 doi: 10.1016/j.yjmed.2004.01.001
- 15
- 16 31. Merrill E, Grassley J. Women's stories of their experiences as overweight patients. *J Adv*
- 17 *Nurs* 2008;64:139–46. doi: 10.1111/j.1365-2648.2008.04794.x
- 18
- 19 32. Thomas SL, Hyde J, Karunaratne A, Herbert D, Komesaroff PA. Being 'fat' in today's world:
- 20 a qualitative study of the lived experiences of people with obesity in Australia. *Health Expect*
- 21 2008;11:321–30. doi: 10.1111/j.1369-7625.2008.00490.x
- 22
- 23 33. Brown HL. Providers' familiarity with guidelines for weight gain during pregnancy impacts
- 24 counseling and compliance in obese women. *J Womens Health (Larchmt)* 2017;26:1139–
- 25 40. doi: 10.1089/jwh.2017.6545
- 26
- 27 34. Tuthill A, Slawik H, O'Rahilly S, Finer N. Psychiatric co-morbidities in patients attending
- 28 specialist obesity services in the UK. *QJM* 2006;99:317–25. doi: 10.1093/qjmed/hcl041
- 29
- 30 35. Hill AJ, Williams J. Psychological health in a non-clinical sample of obese women. *Int J*
- 31 *Obes Relat Metab Disord* 1998;22:578–83. doi: 10.1038/sj.ijo.0800631
- 32
- 33 36. Brown I, Stride C, Psarou A, Brewins L, Thompson J. Management of obesity in primary
- 34 care: nurses' practices, beliefs and attitudes. *J Adv Nurs* 2007;59:329–41. doi:
- 35 10.1111/j.1365-2648.2007.04297.x
- 36
- 37 37. Leverage RR, Williams RL, Sussman A, Crabtree BF, RIOS Net Clinicians. Obesity
- 38 counseling and guidelines in primary care: a qualitative study. *Am J Prev Med* 2007;32:334–
- 39 39. doi: 10.1016/j.amepre.2006.12.008
- 40
- 41 38. Blane DN, Macdonald S, Morrison D, O'Donnell CA. The role of primary care in adult weight
- 42 management: qualitative interviews with key stakeholders in weight management services.
- 43 *BMC Health Serv Res* 2017;17:764. doi: 10.1186/s12913-017-2729-7
- 44
- 45 39. Dewhurst A, Peters S, Devereux-Fitzgerald A, Hart J. Physicians' views and experiences of
- 46 discussing weight management within routine clinical consultations: a thematic synthesis.
- 47 *Patient Educ Couns* 2017;100:897–908. doi: 10.1016/j.pec.2016.12.017
- 48
- 49 40. Henderson E. Obesity in primary care: a qualitative synthesis of patient and practitioner
- 50 perspectives on roles and responsibilities. *Br J Gen Pract* 2015;65:e240–7.
- 51 doi: 10.3399/bjgp15X684397
- 52
- 53 41. World Health Organization (WHO). Obesity: preventing and managing the global epidemic.
- 54 Report of a WHO Consultation. 2000.
- 55 [https://www.who.int/nutrition/publications/obesity/WHO\\_TRS\\_894/en/](https://www.who.int/nutrition/publications/obesity/WHO_TRS_894/en/) [Accessed April 2020].
- 56
- 57 42. Malterud K, Thesen J. When the helper humiliates the patient: a qualitative study about
- 58 unintended intimidations. *Scand J Public Health* 2008;36:92–8. doi:
- 59 10.1177/1403494807085358
- 60

- 1  
2  
3 43. Ananthakumar T, Jones NR, Hinton L, Aveyard P. Clinical encounters about obesity:  
4 systematic review of patients' perspectives. *Clin Obes* 2020;10:e12347. doi:  
5 10.1111/cob.12347  
6
- 7 44. Speer SA, McPhillips R. Initiating discussions about weight in a non-weight-specific setting:  
8 what can we learn about the interactional consequences of different communication  
9 practices from an examination of clinical consultations? *Br J Health Psychol* 2018;23:888–  
10 907.  
11 doi: 10.1111/bjhp.12322  
12
- 13 45. Gadsby EW, Peckham S, Coleman A, *et al.* Commissioning for health improvement  
14 following the 2012 health and social care reforms in England: what has changed? *BMC*  
15 *Public Health* 2017;17:211. doi: 10.1186/s12889-017-4122-1  
16
- 17 46. McGowan BM. A practical guide to engaging individuals with obesity. *Obes Facts*  
18 2016;9:182–92. doi: 10.1159/000445193  
19
- 20 47. Martin S, Davies E, Gershlick B. Under pressure. What the Commonwealth Fund's 2015  
21 international survey of general practitioners means for the UK. 2016.  
22 <https://www.health.org.uk/sites/default/files/UnderPressure.pdf> [Accessed 1 December  
23 2019].  
24
- 25 48. Swift JA, Choi E, Puhl RM, Glazebrook C. Talking about obesity with clients: preferred terms  
26 and communication styles of U.K. pre-registration dietitians, doctors, and nurses. *Patient*  
27 *Educ Couns* 2013;91:186–91. doi: 10.1016/j.pec.2012.12.008  
28
- 29 49. Ogden J, Flanagan Z. Beliefs about the causes and solutions to obesity: a comparison of  
30 GPs and lay people. *Patient Educ Couns* 2008;71:72–8. doi: 10.1016/j.pec.2007.11.022  
31
- 32 50. Public Health England. Spend and outcome tool (SPOT). 2017.  
33 <https://www.gov.uk/government/publications/spend-and-outcome-tool-spot> [Accessed April  
34 2020].  
35
- 36 51. Public Health England. National mapping of weight management services: provision of tier 2  
37 and tier 3 services in England. 2015. [https://www.gov.uk/government/publications/weight-](https://www.gov.uk/government/publications/weight-management-services-national-mapping)  
38 [management-services-national-mapping](https://www.gov.uk/government/publications/weight-management-services-national-mapping) [Accessed 17 January 2020].  
39
- 40 52. Campbell K, Engel H, Timperio A, *et al.* Obesity management: Australian general  
41 practitioners' attitudes and practices. *Obes Res* 2000;8:459–66. doi: 10.1038/oby.2000.57  
42
- 43 53. Claridge R, Gray L, Stubbe M, *et al.* General practitioner opinion of weight management  
44 interventions in New Zealand. *J Prim Health Care* 2014;6:212–20.  
45  
46  
47  
48  
49  
50  
51  
52  
53  
54  
55  
56  
57  
58  
59  
60

Figure 1

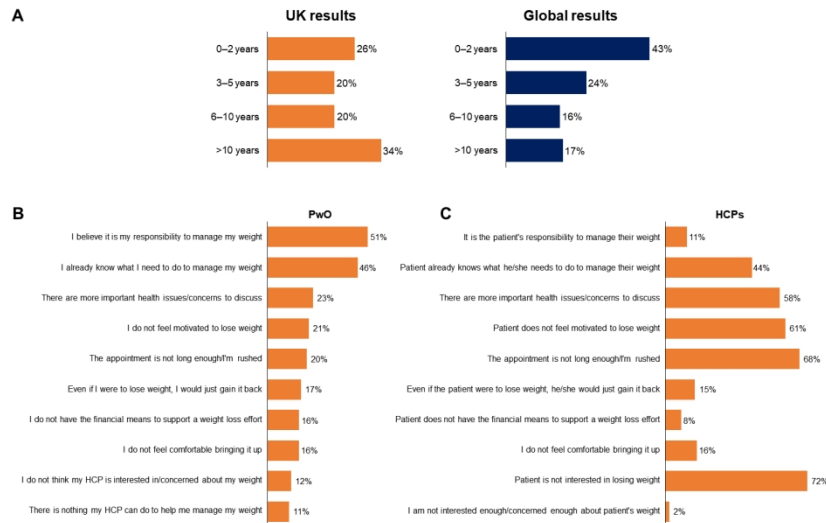

**Figure 1** Number of years between when struggle with weight began and first discussed with an HCP and PwO/HCP reasons for not discussing weight management. **(A)** Approximate number of years reported by UK and global PwO (ACTION-IO study steering committee, personal communication) between the beginning of their struggle with weight and first discussion with an HCP. Calculated at respondent level from questions “Approximately how old were you when you first remember struggling with excess weight or obesity?” and “Approximately how old were you when a healthcare provider first discussed your excess weight or recommended that you lose weight?”. **(B)** Reasons reported by UK PwO for not discussing managing their weight with an HCP. **(C)** Reasons reported by UK HCPs for not discussing weight management with their patients. HCP, healthcare professional; PwO, people with obesity.

508x304mm (96 x 96 DPI)

Figure 2

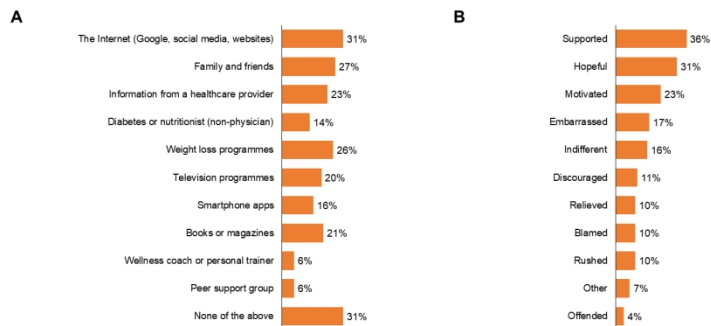

**Figure 2** Sources of information and feelings after a weight discussion. **(A)** Sources of information most frequently used by UK PwO for managing weight (reported by PwO). **(B)** Feelings reported by UK PwO after their most recent weight or weight loss discussion with an HCP in the past 5 years. HCP, healthcare professional; PwO, people with obesity.

508x304mm (96 x 96 DPI)



1  
2  
3  
4  
5  
6  
7  
8  
9  
10  
11  
12  
13  
14  
15  
16  
17  
18  
19  
20  
21  
22  
23  
24  
25  
26  
27  
28  
29  
30  
31  
32  
33  
34  
35  
36  
37  
38  
39  
40  
41  
42  
43  
44  
45  
46  
47  
48  
49  
50  
51  
52  
53  
54  
55  
56  
57  
58  
59  
60

**Figure 3**

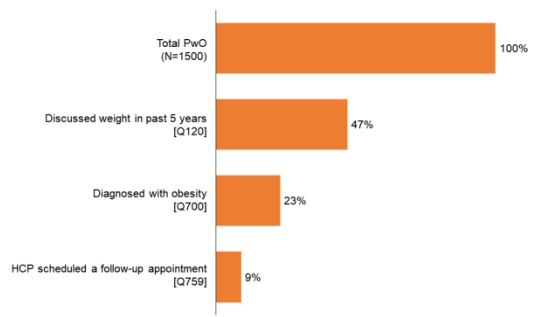

**Figure 3** Obesity diagnoses and follow-up appointments with an HCP. Proportion of UK PwO who discussed weight or weight loss with an HCP in the past 5 years and the frequency of obesity diagnoses and follow-up appointments. HCP, healthcare professional; PwO, people with obesity.

508x304mm (96 x 96 DPI)

Figure 4

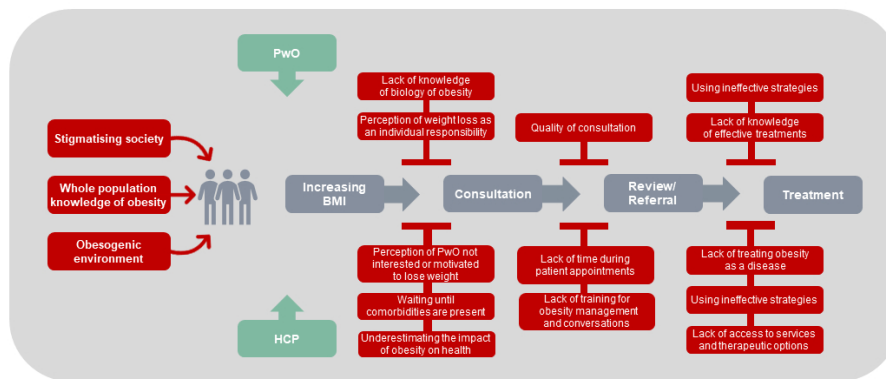

**Figure 4** A conceptual model of the obesity treatment pathway and barriers to obesity care in the UK. BMI, body mass index; HCP, healthcare professional; PwO, people with obesity.

304x203mm (96 x 96 DPI)

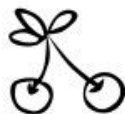

## Checklist for Reporting Results of Internet E-Surveys (CHERRIES)

| Section/Topic                                                                        | Checklist item                                                                                                                                                                                                                         | Reported on page No                                                                                                    |
|--------------------------------------------------------------------------------------|----------------------------------------------------------------------------------------------------------------------------------------------------------------------------------------------------------------------------------------|------------------------------------------------------------------------------------------------------------------------|
| Design                                                                               | Describe survey design: Describe target population, sample frame. Is the sample a convenience sample? (In "open" surveys this is most likely.)                                                                                         | 6–7                                                                                                                    |
| IRB (Institutional Review Board) approval and informed consent process               | IRB approval: Mention whether the study has been approved by an IRB.                                                                                                                                                                   | 19                                                                                                                     |
|                                                                                      | Informed consent: Describe the informed consent process. Where were the participants told the length of time of the survey, which data were stored and where and for how long, who the investigator was, and the purpose of the study? | Previously published in Caterson et al, page 3 (left column), lines 37–40 and supplement pg. 2, lines 6–9              |
|                                                                                      | Data protection: If any personal information was collected or stored, describe what mechanisms were used to protect unauthorized access.                                                                                               | Previously published in Caterson et al, supplement pg. 2, lines 30–38                                                  |
| Development and pre-testing                                                          | Development and testing: State how the survey was developed, including whether the usability and technical functionality of the electronic questionnaire had been tested before fielding the questionnaire.                            | In brief on pages 7 and 8. Previously published in detail in Caterson et al, pg. 3, lines 20–25 (left column)          |
| Recruitment process and description of the sample having access to the questionnaire | Open survey versus closed survey: An "open survey" is a survey open for each visitor of a site, while a closed survey is only open to a sample which the investigator knows (password-protected survey).                               | Previously published in Caterson et al, pg. 3, lines 30–32 (left column) and supplement pg. 2, lines 4–5 and pg 26, 27 |
|                                                                                      | Contact mode: Indicate whether or not the initial contact with the potential participants was made on the Internet. (Investigators may also send out questionnaires by mail and allow for Web-based data entry.)                       | 6                                                                                                                      |
|                                                                                      | Advertising the survey: How/where was the survey announced or advertised? Some examples are offline media (newspapers), or online (mailing lists – If yes, which ones?) or banner ads                                                  | Previously published in detail in Caterson et al,                                                                      |

|                       |                                                                                                                                                                                                                                                                                                                                                                                                                                                                                                                                                                                                                                                                                                                                                                                                                                                                                                                                                                                                                                                                                                                                                                                                                                                                                                                                                                                                                                                                                                                                                                                                                                                                                                                                                                                                                                                      |                                                                                                                                                                                                                                                                                                                                                                                                                     |
|-----------------------|------------------------------------------------------------------------------------------------------------------------------------------------------------------------------------------------------------------------------------------------------------------------------------------------------------------------------------------------------------------------------------------------------------------------------------------------------------------------------------------------------------------------------------------------------------------------------------------------------------------------------------------------------------------------------------------------------------------------------------------------------------------------------------------------------------------------------------------------------------------------------------------------------------------------------------------------------------------------------------------------------------------------------------------------------------------------------------------------------------------------------------------------------------------------------------------------------------------------------------------------------------------------------------------------------------------------------------------------------------------------------------------------------------------------------------------------------------------------------------------------------------------------------------------------------------------------------------------------------------------------------------------------------------------------------------------------------------------------------------------------------------------------------------------------------------------------------------------------------|---------------------------------------------------------------------------------------------------------------------------------------------------------------------------------------------------------------------------------------------------------------------------------------------------------------------------------------------------------------------------------------------------------------------|
|                       | (Where were these banner ads posted and what did they look like?). It is important to know the wording of the announcement as it will heavily influence who chooses to participate. Ideally the survey announcement should be published as an appendix.                                                                                                                                                                                                                                                                                                                                                                                                                                                                                                                                                                                                                                                                                                                                                                                                                                                                                                                                                                                                                                                                                                                                                                                                                                                                                                                                                                                                                                                                                                                                                                                              | supplement pg. 26, 27                                                                                                                                                                                                                                                                                                                                                                                               |
| Survey administration | <p>Web/E-mail: State the type of e-survey (eg, one posted on a Web site, or one sent out through e-mail). If it is an e-mail survey, were the responses entered manually into a database, or was there an automatic method for capturing responses?<br/> <i>“Respondents were recruited via online panel companies (via e-mail) to whom they had given permission to be contacted for research purposes, and completed the survey in English. All respondents provided electronic informed consent prior to initiation of the screening questions and survey.”</i></p> <p>Context: Describe the Web site (for mailing list/newsgroup) in which the survey was posted. What is the Web site about, who is visiting it, what are visitors normally looking for? Discuss to what degree the content of the Web site could pre-select the sample or influence the results. For example, a survey about vaccination on a anti-immunization Web site will have different results from a Web survey conducted on a government Web site</p> <p>Mandatory/voluntary: Was it a mandatory survey to be filled in by every visitor who wanted to enter the Web site, or was it a voluntary survey?</p> <p>Incentives: Were any incentives offered (eg, monetary, prizes, or non-monetary incentives such as an offer to provide the survey results)?</p> <p>Time/Date: In what timeframe were the data collected?<br/> <i>“KJT Group managed the acquisition and analysis of data; UK responses were collected between September and October 2018.”</i></p> <p>Randomization of items or questionnaires: To prevent biases items can be randomized or alternated.</p> <p>Adaptive questioning: Use adaptive questioning (certain items, or only conditionally displayed based on responses to other items) to reduce number and complexity of the questions.</p> | <p>In brief on pg. 6. Previously published in detail in Caterson et al, supplement pg. 2 lines 35, 36</p> <p>Not applicable</p> <p>Previously published in Caterson et al, supplement pg. 2, line 9</p> <p>Previously published in Caterson et al, pg 3, line 46 (left column) and supplement pg. 2, lines 15–17</p> <p>7</p> <p>7</p> <p>Previously published in Caterson et al, supplement pg. 2, lines 26–27</p> |

|    |                |                                                                                                                                                                                                                                                                                                                                                                                                                                                                                                                   |                                                                       |
|----|----------------|-------------------------------------------------------------------------------------------------------------------------------------------------------------------------------------------------------------------------------------------------------------------------------------------------------------------------------------------------------------------------------------------------------------------------------------------------------------------------------------------------------------------|-----------------------------------------------------------------------|
| 1  |                | Number of Items: What was the number of questionnaire items per page? The number of items is an important factor for the completion rate.                                                                                                                                                                                                                                                                                                                                                                         | Previously published in Caterson et al, supplement pg. 2, lines 27–28 |
| 2  |                |                                                                                                                                                                                                                                                                                                                                                                                                                                                                                                                   |                                                                       |
| 3  |                |                                                                                                                                                                                                                                                                                                                                                                                                                                                                                                                   |                                                                       |
| 4  |                |                                                                                                                                                                                                                                                                                                                                                                                                                                                                                                                   |                                                                       |
| 5  |                | Number of screens (pages): Over how many pages was the questionnaire distributed? The number of items is an important factor for the completion rate.                                                                                                                                                                                                                                                                                                                                                             | Previously published in Caterson et al, supplement pg. 2, line 27     |
| 6  |                |                                                                                                                                                                                                                                                                                                                                                                                                                                                                                                                   |                                                                       |
| 7  |                |                                                                                                                                                                                                                                                                                                                                                                                                                                                                                                                   |                                                                       |
| 8  |                |                                                                                                                                                                                                                                                                                                                                                                                                                                                                                                                   |                                                                       |
| 9  |                | Completeness check: It is technically possible to do consistency or completeness checks before the questionnaire is submitted. Was this done, and if “yes”, how (usually JavaScript)? An alternative is to check for completeness after the questionnaire has been submitted (and highlight mandatory items). If this has been done, it should be reported. All items should provide a non-response option such as “not applicable” or “rather not say”, and selection of one response option should be enforced. | Previously published in Caterson et al, supplement pg. 2, lines 29–30 |
| 10 |                |                                                                                                                                                                                                                                                                                                                                                                                                                                                                                                                   |                                                                       |
| 11 |                |                                                                                                                                                                                                                                                                                                                                                                                                                                                                                                                   |                                                                       |
| 12 |                |                                                                                                                                                                                                                                                                                                                                                                                                                                                                                                                   |                                                                       |
| 13 |                |                                                                                                                                                                                                                                                                                                                                                                                                                                                                                                                   |                                                                       |
| 14 |                |                                                                                                                                                                                                                                                                                                                                                                                                                                                                                                                   |                                                                       |
| 15 |                |                                                                                                                                                                                                                                                                                                                                                                                                                                                                                                                   |                                                                       |
| 16 |                |                                                                                                                                                                                                                                                                                                                                                                                                                                                                                                                   |                                                                       |
| 17 |                | Review step: State whether respondents were able to review and change their answers (eg, through a Back button or a Review step which displays a summary of the responses and asks the respondents if they are correct).                                                                                                                                                                                                                                                                                          | Previously published in Caterson et al, supplement pg. 2, lines 29–30 |
| 18 |                |                                                                                                                                                                                                                                                                                                                                                                                                                                                                                                                   |                                                                       |
| 19 |                |                                                                                                                                                                                                                                                                                                                                                                                                                                                                                                                   |                                                                       |
| 20 |                |                                                                                                                                                                                                                                                                                                                                                                                                                                                                                                                   |                                                                       |
| 21 |                |                                                                                                                                                                                                                                                                                                                                                                                                                                                                                                                   |                                                                       |
| 22 | Response rates | Unique site visitor: If you provide view rates or participation rates, you need to define how you determined a unique visitor. There are different techniques available, based on IP addresses or cookies or both.                                                                                                                                                                                                                                                                                                | Previously published in Caterson et al, supplement pg. 2, lines 18–20 |
| 23 |                |                                                                                                                                                                                                                                                                                                                                                                                                                                                                                                                   |                                                                       |
| 24 |                |                                                                                                                                                                                                                                                                                                                                                                                                                                                                                                                   |                                                                       |
| 25 |                |                                                                                                                                                                                                                                                                                                                                                                                                                                                                                                                   |                                                                       |
| 26 |                |                                                                                                                                                                                                                                                                                                                                                                                                                                                                                                                   |                                                                       |
| 27 |                | View rate (Ratio of unique survey visitors/unique site visitors): Requires counting unique visitors to the first page of the survey, divided by the number of unique site visitors (not page views!). It is not unusual to have view rates of less than 0.1 % if the survey is voluntary.<br><i>“The response rate to the survey was 14% for PwO and 35% for HCPs”</i>                                                                                                                                            | 8                                                                     |
| 28 |                |                                                                                                                                                                                                                                                                                                                                                                                                                                                                                                                   |                                                                       |
| 29 |                |                                                                                                                                                                                                                                                                                                                                                                                                                                                                                                                   |                                                                       |
| 30 |                |                                                                                                                                                                                                                                                                                                                                                                                                                                                                                                                   |                                                                       |
| 31 |                |                                                                                                                                                                                                                                                                                                                                                                                                                                                                                                                   |                                                                       |
| 32 |                | Participation rate (Ratio of unique visitors who agreed to participate/unique first survey page visitors): Count the unique number of people who filled in the first survey page (or agreed to participate, for example by checking a checkbox), divided by visitors who visit the first page of the survey (or the informed consents page, if present). This can also be called “recruitment” rate.                                                                                                              | 9 (Table 1 footnotes)                                                 |
| 33 |                |                                                                                                                                                                                                                                                                                                                                                                                                                                                                                                                   |                                                                       |
| 34 |                |                                                                                                                                                                                                                                                                                                                                                                                                                                                                                                                   |                                                                       |
| 35 |                |                                                                                                                                                                                                                                                                                                                                                                                                                                                                                                                   |                                                                       |
| 36 |                |                                                                                                                                                                                                                                                                                                                                                                                                                                                                                                                   |                                                                       |
| 37 |                | Completion rate (Ratio of users who finished the survey/users who agreed to participate): The number of people submitting the last questionnaire page, divided by the number of people who agreed to participate (or submitted the first survey page). This is only relevant if there is a separate “informed consent” page or if the survey goes over several pages. This is a measure                                                                                                                           | 9 (Table 1 footnotes)                                                 |
| 38 |                |                                                                                                                                                                                                                                                                                                                                                                                                                                                                                                                   |                                                                       |
| 39 |                |                                                                                                                                                                                                                                                                                                                                                                                                                                                                                                                   |                                                                       |
| 40 |                |                                                                                                                                                                                                                                                                                                                                                                                                                                                                                                                   |                                                                       |
| 41 |                |                                                                                                                                                                                                                                                                                                                                                                                                                                                                                                                   |                                                                       |
| 42 |                |                                                                                                                                                                                                                                                                                                                                                                                                                                                                                                                   |                                                                       |

|                                                      |                                                                                                                                                                                                                                                                                                                                                                                                                                                                                                                                                                                      |                                                                                                       |
|------------------------------------------------------|--------------------------------------------------------------------------------------------------------------------------------------------------------------------------------------------------------------------------------------------------------------------------------------------------------------------------------------------------------------------------------------------------------------------------------------------------------------------------------------------------------------------------------------------------------------------------------------|-------------------------------------------------------------------------------------------------------|
|                                                      | for attrition. Note that “completion” can involve leaving questionnaire items blank. This is not a measure for how completely questionnaires were filled in. (If you need a measure for this, use the word “completeness rate”.)                                                                                                                                                                                                                                                                                                                                                     |                                                                                                       |
| Preventing multiple entries from the same individual | Cookies used: Indicate whether cookies were used to assign a unique user identifier to each client computer. If so, mention the page on which the cookie was set and read, and how long the cookie was valid. Were duplicate entries avoided by preventing users access to the survey twice; or were duplicate database entries having the same user ID eliminated before analysis? In the latter case, which entries were kept for analysis (eg, the first entry or the most recent)?                                                                                               | In brief on pg. 7.<br>Previously published in detail in Caterson et al, supplement pg. 2, lines 18–23 |
|                                                      | IP check: Indicate whether the IP address of the client computer was used to identify potential duplicate entries from the same user. If so, mention the period of time for which no two entries from the same IP address were allowed (eg, 24 hours). Were duplicate entries avoided by preventing users with the same IP address access to the survey twice; or were duplicate database entries having the same IP address within a given period of time eliminated before analysis? If the latter, which entries were kept for analysis (eg, the first entry or the most recent)? | In brief on pg. 7.<br>Previously published in detail in Caterson et al, supplement pg. 2, lines 18–23 |
|                                                      | Log file analysis: Indicate whether other techniques to analyze the log file for identification of multiple entries were used. If so, please describe.                                                                                                                                                                                                                                                                                                                                                                                                                               | Not applicable                                                                                        |
|                                                      | Registration: In “closed” (non-open) surveys, users need to login first and it is easier to prevent duplicate entries from the same user. Describe how this was done. For example, was the survey never displayed a second time once the user had filled it in, or was the username stored together with the survey results and later eliminated? If the latter, which entries were kept for analysis (eg, the first entry or the most recent)?                                                                                                                                      | In brief on pg. 7<br>Additional details published in Caterson et al, supplement pg. 2, lines 18–23    |
| Analysis                                             | Handling of incomplete questionnaires: Were only completed questionnaires analyzed? Were questionnaires which terminated early (where, for example, users did not go through all questionnaire pages) also analyzed?                                                                                                                                                                                                                                                                                                                                                                 | Published previously in Caterson et al, supplement pg. 2, lines 28–30                                 |
|                                                      | Questionnaire submitted with an atypical timestamp: Some investigators may measure the time people needed to fill in a questionnaire and exclude questionnaires that were submitted too soon. Specify the timeframe that was used as a cut-off point, and describe how this point was determined.                                                                                                                                                                                                                                                                                    | Previously published in Caterson et al, supplement pg. 3, lines 27–31                                 |
|                                                      | Statistical correction: Indicate whether any methods such as weighting of items or propensity scores have been used to adjust for the non-representative sample; if so, please describe the methods.                                                                                                                                                                                                                                                                                                                                                                                 | In brief on page 7.<br>Previously published in detail in Caterson et al,                              |

|  |  |                                 |
|--|--|---------------------------------|
|  |  | supplement pg. 4, lines<br>4–16 |
|--|--|---------------------------------|

1  
2  
3  
4 Caterson ID, Alfadda AA, Auerbach P, et al. Gaps to bridge: misalignment between perception, reality and actions in obesity. *Diabetes Obes Metab* 2019;21:1914-1924.  
5  
6  
7  
8  
9

10  
11  
12  
13  
14  
15  
16  
17  
18  
19  
20  
21  
22  
23  
24  
25  
26  
27  
28  
29  
30  
31  
32  
33  
34  
35  
36  
37  
38  
39  
40  
41  
42  
43  
44  
45  
46

For peer review only

# BMJ Open

## Changing the narrative around obesity in the UK: a survey of people with obesity and healthcare professionals from the ACTION-IO study

|                                 |                                                                                                                                                                                                                                                                                                                                                                                                                                                                                                                                                                |
|---------------------------------|----------------------------------------------------------------------------------------------------------------------------------------------------------------------------------------------------------------------------------------------------------------------------------------------------------------------------------------------------------------------------------------------------------------------------------------------------------------------------------------------------------------------------------------------------------------|
| Journal:                        | <i>BMJ Open</i>                                                                                                                                                                                                                                                                                                                                                                                                                                                                                                                                                |
| Manuscript ID                   | bmjopen-2020-045616.R1                                                                                                                                                                                                                                                                                                                                                                                                                                                                                                                                         |
| Article Type:                   | Original research                                                                                                                                                                                                                                                                                                                                                                                                                                                                                                                                              |
| Date Submitted by the Author:   | 01-Mar-2021                                                                                                                                                                                                                                                                                                                                                                                                                                                                                                                                                    |
| Complete List of Authors:       | Hughes, Carly Anna; Fakenham Medical Practice, Fakenham Weight Management Service; University of East Anglia, Norwich Medical School<br>Ahern, Amy; University of Cambridge, MRC Epidemiology Unit<br>Kasetty, Harsha; Novo Nordisk Ltd<br>McGowan, Barbara; Guy's and St Thomas' NHS Foundation Trust, Institute of Diabetes, Endocrinology and Obesity<br>Parretti, Helen; University of East Anglia, Norwich Medical School<br>Vincent, Ann; University College London, Department of Medicine<br>Halford, Jason; University of Leeds, School of Psychology |
| <b>Primary Subject Heading</b>: | Global health                                                                                                                                                                                                                                                                                                                                                                                                                                                                                                                                                  |
| Secondary Subject Heading:      | Public health, Nutrition and metabolism, Medical education and training, General practice / Family practice, Epidemiology                                                                                                                                                                                                                                                                                                                                                                                                                                      |
| Keywords:                       | GENERAL MEDICINE (see Internal Medicine), PUBLIC HEALTH, EPIDEMIOLOGY, MEDICAL EDUCATION & TRAINING                                                                                                                                                                                                                                                                                                                                                                                                                                                            |
|                                 |                                                                                                                                                                                                                                                                                                                                                                                                                                                                                                                                                                |

SCHOLARONE™  
Manuscripts





I, the Submitting Author has the right to grant and does grant on behalf of all authors of the Work (as defined in the below author licence), an exclusive licence and/or a non-exclusive licence for contributions from authors who are: i) UK Crown employees; ii) where BMJ has agreed a CC-BY licence shall apply, and/or iii) in accordance with the terms applicable for US Federal Government officers or employees acting as part of their official duties; on a worldwide, perpetual, irrevocable, royalty-free basis to BMJ Publishing Group Ltd ("BMJ") its licensees and where the relevant Journal is co-owned by BMJ to the co-owners of the Journal, to publish the Work in this journal and any other BMJ products and to exploit all rights, as set out in our [licence](#).

The Submitting Author accepts and understands that any supply made under these terms is made by BMJ to the Submitting Author unless you are acting as an employee on behalf of your employer or a postgraduate student of an affiliated institution which is paying any applicable article publishing charge ("APC") for Open Access articles. Where the Submitting Author wishes to make the Work available on an Open Access basis (and intends to pay the relevant APC), the terms of reuse of such Open Access shall be governed by a Creative Commons licence – details of these licences and which [Creative Commons](#) licence will apply to this Work are set out in our licence referred to above.

Other than as permitted in any relevant BMJ Author's Self Archiving Policies, I confirm this Work has not been accepted for publication elsewhere, is not being considered for publication elsewhere and does not duplicate material already published. I confirm all authors consent to publication of this Work and authorise the granting of this licence.

# Changing the narrative around obesity in the UK: a survey of people with obesity and healthcare professionals from the ACTION-IO study

Carly A Hughes,<sup>1,2</sup> Amy L Ahern,<sup>3</sup> Harsha Kasetty,<sup>4</sup> Barbara M McGowan,<sup>5</sup> Helen M Parretti,<sup>2</sup> Ann Vincent,<sup>6</sup> Jason CG Halford<sup>7</sup>

<sup>1</sup>Fakenham Weight Management Service, Fakenham Medical Practice, Fakenham, Norfolk, UK

<sup>2</sup>Norwich Medical School, University of East Anglia, Norwich, Norfolk, UK

<sup>3</sup>MRC Epidemiology Unit, University of Cambridge, Cambridge, UK

<sup>4</sup>Novo Nordisk, Gatwick, UK

<sup>5</sup>Institute of Diabetes, Endocrinology and Obesity, Guy's and St Thomas' NHS Foundation Trust, London, UK

<sup>6</sup>Department of Medicine, University College London, London, UK

<sup>7</sup>School of Psychology, University of Leeds, West Yorkshire, UK

Correspondence to:

**Name:** Carly Hughes

**Address:** Meditrinia House

Trinity Road

Fakenham

Norfolk NR21 8AS

United Kingdom

**Tel:** +44 1328 851 321

**Email:** carlyannahughes@gmail.com

**Word count:** 4215

**Keywords:** obesity, perceptions, attitudes, barriers, United Kingdom, ACTION-IO

## ABSTRACT

**Objectives:** To investigate the perceptions, attitudes, behaviours and potential barriers to effective obesity care in the UK using data collected from people with obesity (PwO) and healthcare professionals (HCPs) in the ACTION-IO study (NCT03584191).

**Design:** UK PwO (body mass index of  $\geq 30$  kg/m<sup>2</sup> based on self-reported height and weight) and HCPs who manage patients with obesity completed an online survey.

**Results:** In the UK, 1500 PwO and 306 HCPs completed the survey. Among the 47% of PwO who discussed weight with an HCP in the past 5 years, it took a mean of 9 years from the start of their struggles with weight until a discussion occurred. HCPs reported that PwO initiated 35% of weight-related discussions; PwO reported they initiated 47% of discussions. Most PwO (85%) assumed full responsibility for their own weight loss. The presence of obesity-related comorbidities was cited by 76% of HCPs as a top criterion for initiating weight management conversations. The perception of lack of interest (72%) and motivation (61%) in losing weight were reported as top reasons by HCPs for not discussing weight with a patient. Sixty-five percent of PwO liked their HCP bringing up weight during appointments. PwO reported complex and varied emotions following a weight loss conversation with an HCP, including supported (36%), hopeful (31%), motivated (23%), and embarrassed (17%). Follow-up appointments were scheduled for 19% of PwO after a weight discussion despite 62% wanting follow-up.

**Conclusions:** The current narrative around obesity requires a paradigm shift in the UK to address the delay between PwO struggling with their weight and discussing weight with their HCP. Perceptions of lack of patient interest and motivation in weight management must be challenged along with the blame culture of individual responsibility that is prevalent throughout society. While PwO may welcome weight-related conversations with an HCP, they evoke complex feelings, demonstrating the need for sensitivity and respect in these conversations.

**Trial registration:** ClinicalTrials.gov NCT03584191

## Strengths and limitations of this study:

- Strengths include the scientific rigour in the study design and implementation
- The large number of UK PwO and HCP respondents and the ability to directly compare the UK data to the equivalent global dataset is an additional strength
- Limitations of this study include possible response bias from the population sampled and recall bias

For peer review only

## BACKGROUND

The causes of obesity are complex and multifaceted, encompassing biological, genetic, environmental, economic, social, and psychological factors.<sup>1-3</sup> The chronic and relapsing nature of obesity is associated with many serious physical and psychological comorbidities, reduced quality of life and increased healthcare costs.<sup>2 4-8</sup> The World Health Organization (WHO) has recognised obesity as a disease, and the National Institute for Health and Care Excellence (NICE) provides guidance on its assessment and treatment.<sup>9</sup> More recently it has been recognised as a risk factor for severity of COVID-19 infection.<sup>5,6</sup> The prevalence of overweight and obesity among adults in the UK has been increasing and was 63% in 2018.<sup>7</sup> This increase is thought to be primarily caused by people's latent biological susceptibility interacting with a changing environment that includes more sedentary lifestyles and increased dietary abundance.<sup>1</sup> The prevalence of adiposity in the UK population is approaching similar levels to those reported in the US (71%), Chile (74%), and Mexico (75%), which are among the highest recorded adult overweight and obesity levels in the world.<sup>8</sup> The number of people with obesity (PwO) in the UK continues to rise, and severe and complex obesity (body mass index [BMI]  $\geq 40$  kg/m<sup>2</sup>) increased from less than 1% of the total population in 1993 to nearly 4% in 2017.<sup>10</sup> The UK-wide National Health Service (NHS) costs attributable to overweight and obesity are projected to reach £9.7 billion by 2050, with wider societal costs estimated to reach £49.9 billion per year.<sup>11</sup> The significant increase in the prevalence of obesity has not been matched by a proportionate expansion of continuing education on the biological basis and clinical management of obesity and training provision for healthcare professionals (HCPs), irrespective of their discipline.<sup>12</sup> Moreover, little effort has been made to address weight stigma and societal effects of weight bias, which continue to be experienced in a consistently negative way by those who have excess weight or obesity. Current evidence demonstrates that weight stigma is widespread in the UK,<sup>13</sup> that weight stigma is experienced in many settings,<sup>14 15</sup> and that

1  
2  
3 experience of stigma is associated with negative psychosocial outcomes, increased eating,  
4 reduced engagement with physical activity, and weight gain.<sup>16</sup>  
5  
6  
7

8  
9 The variability of causal pathways of weight gain is inherently unsuited to a 'one size fits all'  
10 treatment approach.<sup>1</sup> There is a range of existing guidance to support practice and care  
11 throughout the obesity care pathway in the UK.<sup>9 17</sup> However, the extent and range of the  
12 provision of weight management services is inconsistent and geographically dependent.<sup>18</sup> The  
13 obesity care pathway has an important role within the whole systems approach to tackling  
14 obesity, as outlined in the Foresight report,<sup>1</sup> and endorsed in the Department of Health and  
15 Social Care (DHSC) Call to Action<sup>19</sup> and the Public Health England paper on a whole systems  
16 approach to obesity.<sup>20</sup> The DHSC clinical policy outlines a tiered system of obesity care with a  
17 focus on public health and community advice in tier 1; primary care, community interventions  
18 and pharmacotherapy in tier 2; multi-disciplinary weight management service in tier 3; and  
19 secondary care and bariatric surgery in tier 4.<sup>21</sup>  
20  
21  
22  
23  
24  
25  
26  
27  
28  
29  
30  
31  
32  
33

34  
35 Despite its wide global prevalence, obesity remains poorly understood by the general public and  
36 HCPs, and this contributes to the high levels of stigma associated with obesity.<sup>22</sup> Society is  
37 continually informed through intense media coverage that obesity is simple and easily  
38 manipulated.<sup>23</sup> This attitude contributes to greater perceptions of individual responsibility,  
39 contrary to evidence that suggests that many factors outside a person's control influence  
40 obesity.<sup>22 23</sup> To improve the quality and accessibility of obesity care, a better understanding of  
41 the disease and the gaps between current and optimal obesity management strategies is  
42 required. The Awareness, Care, and Treatment In Obesity maNagement – International  
43 Observation (ACTION-IO) study (NCT03584191) assessed the perceptions, attitudes, and  
44 behaviours of PwO and HCPs.<sup>24</sup> The global dataset<sup>24</sup> revealed a need to increase  
45 understanding of obesity and improve education concerning its aetiology. The aim of this sub-  
46  
47  
48  
49  
50  
51  
52  
53  
54  
55  
56  
57  
58  
59  
60

1  
2  
3 analysis was to identify the perceptions, attitudes, behaviours, and potential barriers to effective  
4 obesity care in the UK.  
5  
6  
7  
8

## 9 **METHODS**

### 10 **Study design and participants**

11  
12 The ACTION-IO study was a cross-sectional, non-interventional study that collected data via an  
13 online survey in Australia, Chile, Israel, Italy, Japan, Mexico, Saudi Arabia, South Korea, Spain,  
14 the UK, and the United Arab Emirates. The full methods for the ACTION-IO study have been  
15 reported previously.<sup>24</sup> Eligible PwO in the UK were 18 years or older, with a current BMI of at  
16 least 30 kg/m<sup>2</sup> based on self-reported height and weight. The PwO sample was targeted for  
17 demographic representativeness based on gender, age, income, race/ethnicity, and region.  
18 Therefore, PwO were excluded if they declined to provide any of these variables. Respondents  
19 were also excluded for non-obesity reasons for high BMI or dramatic weight loss, i.e. if they  
20 were pregnant, participated in intense fitness or body building programmes, or had significant,  
21 unintentional weight loss in the past 6 months. Eligible UK HCPs were in practice for 2 years or  
22 more, with at least 70% of their time spent in direct patient care, and who had seen 100 or more  
23 patients in the past month, at least 10 of whom had a BMI of at least 30 kg/m<sup>2</sup>. HCPs  
24 specialising in general, plastic, or bariatric surgery were excluded. Respondents were recruited  
25 via online panel companies (via e-mail) to whom they had given permission to be contacted for  
26 research purposes, and completed the survey in English. All respondents provided electronic  
27 informed consent prior to initiation of the screening questions and survey. Preceding  
28 participation, PwO were only informed of the purpose of the study, and were blinded to the  
29 specific study goals.  
30  
31  
32  
33  
34  
35  
36  
37  
38  
39  
40  
41  
42  
43  
44  
45  
46  
47  
48  
49  
50  
51  
52  
53  
54

### 55 **Survey development and procedures**

1  
2  
3 The study was designed by an international steering committee of obesity experts (representing  
4 primary care, endocrinology, and psychology, and including three medical doctors employed by  
5 Novo Nordisk), with support from KJT Group (Honeoye Falls, NY, US), and based on the  
6 ACTION US and Canada questionnaires.<sup>25 26</sup> KJT Group managed the acquisition and analysis  
7 of data; UK responses were collected between September and October 2018. Questionnaire  
8 items were carefully phrased and presented in identical order for each respondent. Items in a  
9 list were displayed in alphabetical, categorical, chronological, or random order as relevant for  
10 each response. Respondents accessed the survey using a unique web link, details regarding  
11 the digital fingerprinting system used to assess unique site visitors has been previously  
12 described.<sup>24</sup> To prevent duplicate survey entries, unique site visitors were recorded via a user ID  
13 that was passed along the unique web link that respondents used to access the site. The  
14 system checked every respondent entering the survey against previous user IDs logged in its  
15 database. Respondents who began the survey and suspended were able to re-enter the survey  
16 while it was still open and finish the survey where they left off. Respondents who had already  
17 received a terminal status (complete, over-quota, or terminate) were blocked from re-entering  
18 the survey. Following closure of the survey, no users were able to gain access. The user ID and  
19 data of suspended respondents were stored until the survey was closed and were then  
20 eliminated from the data analysis. The study was conducted in accordance with the Guidelines  
21 for Good Pharmacoepidemiology Practices<sup>27</sup> and is registered with ClinicalTrials.gov, number  
22 NCT03584191.  
23  
24  
25  
26  
27  
28  
29  
30  
31  
32  
33  
34  
35  
36  
37  
38  
39  
40  
41  
42  
43  
44  
45  
46

47 To ensure representativeness to the general population, the final PwO sample was weighted to  
48 demographic targets within each country for age, gender, income, race/ethnicity, and region.  
49 The HCP data were not weighted. Only data from those who completed the survey were  
50 included in the analyses.  
51  
52  
53  
54  
55  
56  
57  
58  
59  
60



## Patient and public involvement

No patients or members of the public were involved in the design or conduct of the study. A patient representative was involved in the analysis and interpretation of the UK data and is an author on this article. She will also be involved in disseminating these findings to a wider audience.

## RESULTS

### Demographics

A total of 69,676 PwO and 2,508 HCPs, in the UK, were invited. The response rate to the survey was 14% (9786/69,676) for PwO and 35% (886/2508) for HCPs, as expected for this type of study and in line with the target sample size.<sup>24</sup> Of those who completed the screening questions, the eligibility rate was 22% (2146/9779) for PwO and 53% (387/737) for HCPs. The final UK sample for the ACTION-IO survey was 1500 PwO and 306 HCPs, of whom 156 were primary care professionals (PCPs) and 150 were secondary care professionals (SCPs) (table 1). Some differences were observed in the survey outcomes between PCPs and SCPs, which will be reported in full at a later date.

**Table 1** Sample demographics and characteristics

|                                                          | UK PwO<br>(n=1500) | HCPs<br>(n=306) |
|----------------------------------------------------------|--------------------|-----------------|
| Recruitment and qualification*                           |                    |                 |
| Total survey invitations sent                            | 69,676             | 2508            |
| Respondents                                              | 9786               | 886             |
| Respondents who completed screening questions            | 9779               | 737             |
| Respondents who qualified                                | 2146               | 387             |
| Respondents who qualified and completed validated survey | 1500               | 306             |

|                                                       |              |              |
|-------------------------------------------------------|--------------|--------------|
| Age, years (range)                                    | 55.7 (19–88) | 48.9 (28–68) |
| Gender, n (%)                                         |              |              |
| Male                                                  | 687 (45.8%)  | 225 (73.5%)  |
| Female                                                | 811 (54.1%)  | 81 (26.5%)   |
| Other                                                 | 2 (0.1%)     | -            |
| BMI classification, n (%)                             |              |              |
| Respondents <sup>†</sup>                              | 1500 (100%)  | 236 (77.1%)  |
| Underweight or healthy range (<25 kg/m <sup>2</sup> ) | -            | 152 (64.4%)  |
| Overweight (25–29.9 kg/m <sup>2</sup> )               | -            | 72 (30.5%)   |
| Obesity Class I (30–34.9 kg/m <sup>2</sup> )          | 883 (56.2%)  | 7 (3.0%)     |
| Obesity Class II (35–39.9 kg/m <sup>2</sup> )         | 333 (22.4%)  | 2 (0.9%)     |
| Obesity Class III (≥40 kg/m <sup>2</sup> )            | 284 (21.4%)  | 3 (1.3%)     |
| Number of comorbidities, n (%)                        |              |              |
| 0                                                     | 264 (16.9%)  | -            |
| 1                                                     | 360 (25.0%)  | -            |
| 2                                                     | 330 (22.2%)  | -            |
| 3                                                     | 257 (16.0%)  | -            |
| ≥4                                                    | 289 (20.0%)  | -            |
| HCP category, n (%)                                   |              | 306 (100%)   |
| PCP                                                   | -            | 156 (51.0%)  |
| SCP                                                   | -            | 150 (49.1%)  |
| Endocrinologist                                       | -            | 43 (14.1%)   |
| Cardiologist                                          | -            | 51 (16.7%)   |
| Obstetrician-gynaecologist                            | -            | 16 (5.2%)    |
| Other                                                 | -            | 40 (13.1%)   |
| Obesity specialist, <sup>‡</sup> n (%)                |              |              |
| Yes                                                   | -            | 162 (52.9%)  |
| No                                                    | -            | 144 (47.1%)  |

All N sizes for PwO are from unweighted data. Demographic percentages (age, gender) are also from unweighted data. All non-demographic percentage results are for PwO weighted data. HCP data were not weighted, therefore N sizes and percentages are all unweighted data.

\*Participation rate (those who completed the screener) was 99.9% for PwO and 84.7% for HCPs; completion rate was 100% for PwO and 85.8% for HCPs.

†Disclosure of height and weight was optional for HCPs. The percentages for the BMI categories were calculated using the number of respondents to this question as the denominator.

‡A physician who meets at least one of the following criteria: at least 50% of their patients are seen for obesity/weight management; or has advanced/formal training in treatment of obesity/weight management beyond medical school; or considers themselves to be an expert in obesity/weight loss management, or works in an obesity service clinic.<sup>24</sup>

BMI, body mass index; HCP, healthcare professional; PCP, primary care professional; PwO, people with obesity; SCP, secondary care professional.

## **Pre-consultation and initiation of weight management discussion**

### **People with obesity**

Only about half (47%) of all PwO had discussed excess weight or losing weight with an HCP in the past 5 years. It took a median of 6 years and mean of 9 years (range 0.0–56.0 years; interquartile range 13) between the time when PwO said they first started struggling with excess weight or obesity and when they first had a weight management conversation with an HCP (figure 1A). In comparison, globally it took a median of 3 years and mean of 6 years (range 0.0–68.0 years; interquartile range 8 [figure 1A]).<sup>24</sup> Forty-seven percent of PwO who discussed weight with an HCP reported that they initiated the conversation themselves. When PwO were asked to name the top five reasons why they may not discuss weight management with their HCP, the most common reason was the belief that it was their own responsibility to manage their weight (51% of PwO) (figure 1B). Indeed, when asked whether they agreed with the statement “my weight loss is completely my responsibility”, 85% of PwO agreed with the statement. Thirty-four percent of PwO said that they were motivated to lose weight, and 36% provided a neutral response (neither agreed nor disagreed that they were motivated). Only 4% of PwO reported an indifference to losing weight as a reason for not discussing managing their

1  
2  
3 weight with an HCP. Sixty-five percent of PwO who had previously had a weight conversation  
4 with their HCP liked that their HCP discussed their weight with them, and 58% who had not  
5 previously had a conversation would have liked their HCP to bring up weight during their  
6 appointments. Most PwO (81%) believed that obesity has a large impact on overall health,  
7 similar to other chronic diseases such as diabetes (82%), stroke (88%), cancer (82%), or  
8 chronic obstructive pulmonary disease (COPD [84%]). The internet was cited as a source of  
9 information used by 31% of PwO for managing weight (figure 2A). Other sources of information  
10 were reported as family and friends (27%), weight loss programmes (26%), information from an  
11 HCP (23%), and media (books/magazines 21%, television programmes 20%) (figure 2A).  
12  
13  
14  
15  
16  
17  
18  
19  
20  
21  
22  
23

#### 24 Healthcare professionals

25  
26 Those HCPs who discussed weight with their patients reported that 35% of the time the patient  
27 initiated the conversation. Compared with PwO (85%), a smaller proportion of HCPs (33%)  
28 placed the responsibility for weight loss on PwO. Only 13% of HCPs thought their patients were  
29 motivated to lose weight, and 42% provided a neutral response (neither agreed nor disagreed  
30 that their patients were motivated). The most commonly selected reason for not discussing  
31 weight management with a patient (selected by 72% of HCPs) was the perception that the  
32 patient was not interested in losing weight, and 61% of HCPs selected lack of patient motivation  
33 (figure 1C). Other reasons provided for not discussing obesity with a patient were that the  
34 appointments were not long enough and that they felt rushed (selected by 68% of HCPs), and  
35 that more important health issues/concerns were an impediment to discussing obesity with a  
36 patient (selected by 58% of HCPs). In addition, almost one third of HCPs (31%) reported that  
37 the good health of a patient and absence of weight-related comorbidities would be a reason for  
38 not discussing weight management. The most important criterion for initiating weight  
39 management conversations with a patient was the presence of obesity-related comorbidities,  
40 cited by 76% of HCPs. Only 68% of UK HCPs (vs 76% of global HCPs<sup>24</sup>) recognised the impact  
41  
42  
43  
44  
45  
46  
47  
48  
49  
50  
51  
52  
53  
54  
55  
56  
57  
58  
59  
60

1  
2  
3 of obesity on health, and it was rated as less serious than diabetes, cancer, stroke, or COPD by  
4  
5 40%, 65%, 62%, and 43% of UK HCPs, respectively.  
6  
7

## 8 9 **Consultation**

### 10 11 People with obesity

12  
13 Eighty-one percent of the PwO who had discussed weight with an HCP had had a discussion  
14  
15 with a PCP, 42% with a nurse, 18% with a dietitian/nutritionist, and 17% with a diabetes  
16  
17 educator. PwO reported a complex mixture of feelings following a weight loss conversation with  
18  
19 an HCP (figure 2B). PwO cited a combination of feelings such as supported 36%, hopeful 31%,  
20  
21 motivated 23%, embarrassed 17%, indifferent 16%, discouraged 11%, relieved 10%, blamed  
22  
23 10%, rushed 10%, offended 4%, and confused 4% (figure 2B).  
24  
25  
26  
27

### 28 29 Healthcare professionals

30  
31 Fifty-nine percent of HCPs reported that they were extremely or very comfortable discussing  
32  
33 weight, 30% were neither comfortable nor uncomfortable, and 11% were a little or not at all  
34  
35 comfortable discussing weight. On average, HCPs reported that they spent 10 minutes  
36  
37 interacting with their patients when discussing weight (range 1–20 minutes).  
38  
39  
40

## 41 42 **Consultation outcomes and follow-up**

### 43 44 People with obesity

45  
46 Among the 47% of PwO who had discussed their weight with an HCP in the past 5 years, 49%  
47  
48 reported that they had been diagnosed with obesity in the past by an HCP (24% of all PwO,  
49  
50 figure 3). Only 19% of PwO who had discussed their weight with an HCP had a follow-up  
51  
52 appointment scheduled (9% of all PwO) (figure 3). However, 62% of PwO would have liked a  
53  
54 follow-up appointment and 96% reported attending or planning to attend a follow-up  
55  
56 appointment if scheduled. The most frequent methods for managing weight tried by PwO were  
57  
58  
59  
60

1  
2  
3 general improvements in eating habits/reducing calories (reported by 61% of PwO) and general  
4 increases in physical activity (55%), which were reported at a greater frequency than by global  
5 PwO (51% and 39% for general eating habits and physical activity, respectively; ACTION-IO  
6 study steering committee, personal communication). Bariatric surgery and behavioural therapy  
7 referral rates were reported in small numbers by UK PwO (1% and 2%, respectively). Visits to a  
8 nutritionist/dietician and obesity specialist were reported less frequently by UK PwO than global  
9 PwO (nutritionist/dietician: 11% UK, 24% global; obesity specialist: 2% UK, 9% global; ACTION-  
10 IO study steering committee, personal communication).  
11  
12  
13  
14  
15  
16  
17  
18  
19  
20  
21

## 22 Healthcare professionals

23  
24 On average, HCPs scheduled follow-up appointments with 33% of their patients for obesity and  
25 46% of HCPs said patients kept these follow-up appointments always or most of the time. HCPs  
26 most frequently recommended general improvements in eating habits/reducing calories  
27 (reported by 61% of HCPs) and general increases in physical activity (65%). Referrals to obesity  
28 specialists were recommended less frequently by UK HCPs (12%) compared with the global  
29 dataset (23%).<sup>24</sup>  
30  
31  
32  
33  
34  
35  
36  
37  
38  
39

## 40 DISCUSSION

41  
42  
43 PwO are faced with biological predispositions, and societal and environmental conditions that  
44 contribute to obesity, weight stigma, and discrimination. Obesity prevention and management  
45 are key health priorities and require a whole systems approach. However, the national response  
46 for obesity focuses on individual responsibility regarding nutrition and lack of physical activity. In  
47 this study, multiple barriers to effective weight management were identified, which are  
48 summarised in figure 4 and discussed below.  
49  
50  
51  
52  
53  
54  
55  
56  
57  
58  
59  
60

### Initiation of weight management discussion with healthcare professionals

Fewer than half of PwO in the UK (47%) had a discussion with an HCP about their weight in the past 5 years,<sup>24</sup> despite HCPs being the gateway to weight management care in the NHS. Moreover, for the PwO who did have a weight discussion, it took a mean of 9 years after they first started struggling with their weight before having the discussion (compared with 6 years globally).<sup>24</sup> This delay is particularly important as it may create an opportunity for significant obesity-related complications to develop. This long delay may also reflect a higher degree of obesity stigma in the UK<sup>28</sup> and a culture of individual responsibility for obesity.<sup>29 30</sup> Indeed, a focus on individual responsibility is reflected in UK government policy on obesity.<sup>31</sup> Reducing the time gap by initiating earlier weight management discussions may be an effective strategy for improving obesity treatment and preventing the development of comorbidities.

From the PwO perspective, a delay in seeking help could be linked to the high percentage (85%) of PwO who perceived their weight loss as completely their responsibility. From the HCP perspective, a delay in discussing obesity with a patient could be linked to reported perceptions that the patient was not interested or motivated in losing weight, consistent with previous research.<sup>32 33</sup> Other impediments to the discussion were HCPs' views that there were more important health issues to discuss and that a weight management discussion is only required when weight-related comorbidities are present, as supported by other studies.<sup>33 34</sup> Moreover, HCPs in the UK underestimated the effect of obesity on health to a greater extent than UK PwO and global HCPs.<sup>24</sup> For PwO this will likely require a change in the narrative around obesity to lessen focus on individual responsibility, and for HCPs a need to increase the understanding of the health consequences of obesity and the desire of PwO for help and support. The internet, media, and family and friends formed a substantial source of information for PwO for managing

1  
2  
3 weight. We need to change this from personal responsibility to recognising the aetiology of  
4 obesity and its implications for PwO.  
5  
6  
7  
8

## 9 **Consultation**

10 Primary care is the gateway to obesity treatment, and most weight management discussions  
11 were held with a primary care physician or nurse. While many PwO welcomed weight  
12 discussions with HCPs, they also reported experiencing complex and varied emotions after  
13 these discussions. It is important to acknowledge the complexity of the experience for PwO.  
14 Studies have previously reported patients feeling that their obesity had been ignored, dismissed,  
15 distorted, or attributed as the explanation of all their health problems by HCPs.<sup>35-37</sup> Negative  
16 experiences can contribute to depression, anxiety, low self-esteem, and body dissatisfaction.<sup>38</sup>  
17  
18 <sup>39</sup> Dissatisfactory conversations with an HCP may discourage PwO from seeking further weight  
19 management help in the future and reinforce feelings of personal responsibility for weight  
20 management. The attitudes of health professionals towards obesity and its management have  
21 been generally reported to be negative, and knowledge and skills in managing obesity have  
22 been noted to be inconsistent.<sup>40-45</sup> Even well-intended acts can cause offence and humiliation,<sup>46</sup>  
23 and PwO often experience their weight in profoundly negative ways as a result of the pervasive  
24 stigmatisation of obesity. Patient experiences are valid indications of the strengths and  
25 shortcomings of the services they receive.<sup>47</sup> It is important to ensure that the narrative around  
26 obesity resonates with the lived experiences of those affected by it and encourages patients to  
27 engage with an HCP.<sup>47</sup> HCPs in turn should aim to provide compassionate care that is free of  
28 bias and use supportive communication and language to facilitate successful and meaningful  
29 conversations.<sup>47</sup>  
30  
31  
32  
33  
34  
35  
36  
37  
38  
39  
40  
41  
42  
43  
44  
45  
46  
47  
48  
49  
50  
51  
52  
53

54 HCPs often have limited time and resources, and lack of time has previously been reported as a  
55 barrier to discussing obesity.<sup>48 49</sup> More HCPs in the UK (68%) than globally (54%) indicated that  
56  
57  
58  
59  
60



1  
2  
3 the limited appointment time would be a factor in not having a weight loss conversation.<sup>24</sup> This  
4 may be a reflection of the average primary care consultation time in the UK, which is 10 minutes  
5 and considerably shorter than in many other countries.<sup>50 51</sup> Other potential barriers described in  
6 the literature have included uncertainty about appropriate language,<sup>48</sup> concerns about  
7 compromising rapport,<sup>9</sup> and concerns discussing a potentially upsetting and stigmatising topic.<sup>22</sup>  
8  
9  
10  
11  
12  
13  
14 <sup>50 52</sup> However, in this study relatively few HCPs reported discomfort with weight discussions.

### 18 **Consultation outcomes and follow-up**

19  
20 Obesity diagnoses, follow-up appointments, and referrals to specialists were infrequently  
21 reported by PwO, which could incorrectly reinforce the feeling of individual responsibility.  
22  
23 Indeed, methods for managing weight reported by PwO, which relied largely on general  
24 improvements in eating habits and physical activity, suggest a lack of knowledge of effective  
25 treatment methods and/or a consequence of the availability of therapeutic options (see below).  
26  
27  
28  
29

30  
31  
32  
33 The data from HCPs on the frequency of follow-up appointments and methods for obesity  
34 management largely aligned with the data from PwO. Barriers to effective weight management  
35 cited in the literature have included lack of effective and individualised treatment and/or referral  
36 options.<sup>40 41 50 53</sup> Weight management services in the UK exist as part of fragmented health and  
37 social care systems, which are geographically dependent.<sup>49 54 55</sup> The range of services and  
38 treatments, including pharmacotherapy and bariatric surgery, is limited in the UK, which may  
39 restrict HCPs in what they can offer patients. Indeed, HCPs report insufficient management  
40 options and scepticism about their efficacy.<sup>56 57</sup> This is further compounded by limited  
41 consultation times for UK GPs.<sup>50 51</sup> The limited availability of weight management services,  
42 effective treatments and coherent, joined-up strategies in the UK health system are significant  
43 barriers to providing effective obesity care.<sup>55</sup>  
44  
45  
46  
47  
48  
49  
50  
51  
52  
53  
54  
55  
56  
57  
58  
59  
60

### Strengths and limitations

Strengths of this study include scientific rigour in the study design (including carefully phrased and ordered questions to prevent biased responses, blinded purpose of the survey for PwO, and determination of eligibility by initial screening questions to eradicate bias during recruitment) and implementation (including stratified sampling to provide a representative cohort of the general population and rigorous data analysis). Other strengths include the large number of UK PwO and HCP respondents and the ability to directly compare the UK data to the equivalent global dataset. Limitations include the cross-sectional design and reliance on accurate reporting from the PwO and HCP respondents, which could be perceived as recall bias. The self-reported height and weight could underestimate the BMI of the PwO. A higher proportion of HCPs than might be expected self-identified as obesity specialists using the broad criteria specified in table 1. The low response rates could affect sample representativeness and is a known limitation for this type of study. Response bias from the population sampled cannot be ruled out. However, the PwO sample was representative of the demographics of the general population.

### Conclusion

This study demonstrates the need to change the narrative around obesity, with less stigmatising focus on individual responsibility, for the government, commissioners, general public, PwO, and HCPs. The findings identified areas that prevent PwO from seeking help and receiving appropriate care. In addition, the attitudes of HCPs prevent them from offering the support PwO require for obesity management. The consultation about weight with an HCP is the gateway to treatment in the NHS and improving the frequency and quality of PwO–HCP conversations is essential. Sufficient time should be given to HCPs to approach the topic of overweight and obesity sensitively and effectively. The current survey did not have high numbers of people with a BMI of over 40 kg/m<sup>2</sup>; further research is required to understand whether people with higher BMIs have distinct experiences in the management of their obesity.

1  
2  
3  
4  
5 To conclude, a whole systems approach is required to address and eliminate weight bias and  
6 stigmatisation, to change the narrative around obesity in the UK, and to improve provision of  
7 NHS services. Educating the whole population, including PwO and HCPs, about the aetiology  
8 and psychology of obesity and the interaction with the obesogenic environment should help to  
9 ensure that patients access and receive quality care and effective weight treatment and  
10 management. Changing the narrative around obesity will allow for a more effective delivery  
11 framework for health service providers and greater access to effective treatment pathways and  
12 weight management services for PwO.  
13  
14  
15  
16  
17  
18  
19  
20  
21  
22  
23  
24  
25  
26  
27  
28  
29  
30  
31  
32  
33  
34  
35  
36  
37  
38  
39  
40  
41  
42  
43  
44  
45  
46  
47  
48  
49  
50  
51  
52  
53  
54  
55  
56  
57  
58  
59  
60

## Contributors

CAH and JCGH are members of the ACTION-IO study steering committee and contributed to the design of the study. CAH, ALA, HK, BMM, HMP, AV and JCGH participated in the interpretation of data, and drafting and revision of the manuscript. All authors reviewed and approved the final, submitted version.

## Funding

This work and ACTION-IO was supported by Novo Nordisk. ALA is funded by the Medical Research Council through grant MC\_UU\_00006/6.

## Competing interests

CAH reports financial support from Novo Nordisk to attend an obesity conference during the conduct of the study, grants from the Rona Marsden Fund at Fakenham Medical Practice, and personal fees from Orexigen Therapeutics, Consilient Health, Nestlé, Ethicon, and Alva outside the submitted work. ALA reports grants from UKRI Medical Research Council and National Institute for Health Research, and non-financial support from WW (formerly Weight Watchers). HK is an employee of Novo Nordisk and owns shares in Novo Nordisk. BMM reports grants paid to her institution from Novo Nordisk and personal fees (consultancy and advisory board) from Novo Nordisk, Boehringer Ingelheim, and Orexigen Therapeutics; BMM has received speaker fees for Eli Lilly, Novo Nordisk, Boehringer Ingelheim, Janssen, MSD, and Sanofi. HMP reports grants from the National Institute for Health Research and Public Health England and an honorarium from Novo Nordisk (educational grant) outside the submitted work. AV acted as a speaker for Obesity Empowerment Network and is a board member of the Clinical Advisory Committee on the All Wales Obesity Strategy. JCGH reports fees (honoraria) paid to the

1  
2  
3 University of Liverpool from Novo Nordisk, Orexigen, and Boehringer Ingelheim during the  
4  
5 conduct of the study.  
6  
7  
8

## 9 10 **Ethics approval**

11  
12 The National Health Service Health Research Authority (London – Central Research Ethics  
13  
14 Committee) advised that ethical approval was not needed in the UK.  
15  
16  
17

## 18 19 **Transparency statement**

20  
21  
22 CAH affirms that the manuscript is an honest, accurate, and transparent account of the study  
23  
24 being reported; that no important aspects of the study have been omitted; and that any  
25  
26 discrepancies from the study as originally planned have been explained.  
27  
28  
29

## 30 31 **Data sharing**

32  
33 Deidentified participant data will be made available for this Article on a specialised SAS data  
34  
35 platform. Datasets from Novo Nordisk will be available permanently after completion of data  
36  
37 analysis. Access to data can be made through a request proposal form and the access criteria  
38  
39 can be found online (novonordisk-trials.com). Data will be shared with bona fide researchers  
40  
41 submitting a research proposal requesting access to data. Data use is subject to approval by  
42  
43 the Independent Review Board.  
44  
45  
46  
47

## 48 49 **Dissemination declaration**

50  
51 Dissemination of the results to study participants and/or patient organisations is not applicable  
52  
53 for this non-interventional, survey study.  
54  
55  
56  
57  
58  
59  
60

## Acknowledgements

We thank the participants of the study. Medical editorial assistance was provided by Anna Bacon from Articulate Science, Ltd, and was funded by Novo Nordisk.

For peer review only

## TABLE AND FIGURE LEGENDS

**Table 1** Sample demographics and characteristics.

**Figure 1** Number of years between when struggle with weight began and first discussed with an HCP and PwO/HCP reasons for not discussing weight management. **(A)** Approximate number of years reported by UK and global PwO (ACTION-IO study steering committee, personal communication) between the beginning of their struggle with weight and first discussion with an HCP. Calculated at respondent level from questions “Approximately how old were you when you first remember struggling with excess weight or obesity?” and “Approximately how old were you when a healthcare provider first discussed your excess weight or recommended that you lose weight?”. **(B)** Reasons reported by UK PwO for not discussing managing their weight with an HCP. **(C)** Reasons reported by UK HCPs for not discussing weight management with their patients.

HCP, healthcare professional; PwO, people with obesity.

**Figure 2** Sources of information and feelings after a weight discussion. **(A)** Sources of information most frequently used by UK PwO for managing weight (reported by PwO). **(B)** Feelings reported by UK PwO after their most recent weight or weight loss discussion with an HCP in the past 5 years.

HCP, healthcare professional; PwO, people with obesity.

**Figure 3** Obesity diagnoses and follow-up appointments with an HCP. Proportion of UK PwO who discussed weight or weight loss with an HCP in the past 5 years and the frequency of obesity diagnoses and follow-up appointments.

HCP, healthcare professional; PwO, people with obesity.

1  
2  
3  
4  
5 **Figure 4** A conceptual model of the obesity treatment pathway and barriers to obesity care in  
6 the UK.

7  
8 BMI, body mass index; HCP, healthcare professional; PwO, people with obesity.  
9  
10  
11  
12  
13  
14  
15  
16  
17  
18  
19  
20  
21  
22  
23  
24  
25  
26  
27  
28  
29  
30  
31  
32  
33  
34  
35  
36  
37  
38  
39  
40  
41  
42  
43  
44  
45  
46  
47  
48  
49  
50  
51  
52  
53  
54  
55  
56  
57  
58  
59  
60

For peer review only



## References

1. Foresight. Tackling obesity: future choices. 2007. <https://www.gov.uk/government/collections/tackling-obesity-future-choices> [Accessed 15 January 2020].
2. Bray GA, Kim KK, Wilding JPH, World Obesity Federation. Obesity: a chronic relapsing progressive disease process. A position statement of the World Obesity Federation. *Obes Rev* 2017;18:715–23. doi: 10.1111/obr.12551
3. Ralston J, Brinsden H, Buse K, *et al*. Time for a new obesity narrative. *Lancet* 2018;392:1384–86. doi: 10.1016/s0140-6736(18)32537-6
4. Ghanemi A, Yoshioka M, St-Amand J. Broken energy homeostasis and obesity pathogenesis: the surrounding concepts. *J Clin Med* 2018;7:453. doi: 10.3390/jcm7110453
5. Kassir R. Risk of COVID-19 for patients with obesity. *Obes Rev* 2020;21:e13034. doi: 10.1111/obr.13034
6. Garg S, Kim L, Whitaker M, *et al*. Hospitalization rates and characteristics of patients hospitalized with laboratory-confirmed coronavirus disease 2019 — COVID-NET, 14 states, March 1–30, 2020. *MMWR Morb Mortal Wkly Rep* 2020;69:458–64.
7. NHS Digital. Health Survey for England 2018. Overweight and obesity in adults and children. <http://healthsurvey.hscic.gov.uk/media/81625/HSE18-Adult-Child-Obesity-rep.pdf> [Accessed June 2020].
8. The Organization for Economic Cooperation and Development (OECD). Overweight or obese population (indicator). 2019. <https://data.oecd.org/healthrisk/overweight-or-obese-population.htm> [Accessed June 2020].
9. National Institute of Health and Care Excellence (NICE). Obesity: identification, assessment and management. 2014. <https://www.nice.org.uk/guidance/cg189/resources/obesity-identification-assessment-andmanagement-pdf-35109821097925> [Accessed 28 November 2019].
10. NHS Digital. Statistics on Obesity, Physical Activity and Diet, England, 2019. <https://digital.nhs.uk/data-and-information/publications/statistical/statistics-on-obesity-physical-activity-and-diet/statistics-on-obesity-physical-activity-and-diet-england-2019/part-3-adult-obesity> [Accessed 2 December 2019].
11. Public Health England. Health matters: obesity and the food environment. 2017. <https://www.gov.uk/government/publications/health-matters-obesity-and-the-food-environment/health-matters-obesity-and-the-food-environment--2> [Accessed April 2020].
12. Royal College of Physicians. The training of health professionals for the prevention and treatment of overweight and obesity 2010. <https://www.rcplondon.ac.uk/news/rcp-report-concludes-all-health-professionals-need-obesity-training> [Accessed 3 December 2019].
13. Flint SW, Hudson J, Lavalley D. UK adults' implicit and explicit attitudes towards obesity: a cross-sectional study. *BMC Obes* 2015;2:31. doi: 10.1186/s40608-015-0064-2
14. Flint SW, Čadek M, Codreanu SC, *et al*. Obesity discrimination in the recruitment process: "you're not hired!". *Front Psychol* 2016;7:647. doi: 10.3389/fpsyg.2016.00647

15. Flint SW, Reale S. Weight stigma in frequent exercisers: Overt, demeaning and condescending. *J Health Psychol* 2018;23:710–19. doi: 10.1177/1359105316656232
16. Vartanian LR, Novak SA. Internalized societal attitudes moderate the impact of weight stigma on avoidance of exercise. *Obesity (Silver Spring)* 2011;19:757–62. doi: 10.1038/oby.2010.234
17. Department of Health, Obesity and Food Policy Branch. Developing a specification for lifestyle weight management services. Best practice guidance for tier 2 services. 2013. [https://assets.publishing.service.gov.uk/government/uploads/system/uploads/attachment\\_data/file/142723/Weight\\_Management\\_Service\\_Spec\\_FINAL\\_with\\_IRB.pdf](https://assets.publishing.service.gov.uk/government/uploads/system/uploads/attachment_data/file/142723/Weight_Management_Service_Spec_FINAL_with_IRB.pdf) [Accessed April 2020].
18. Public Health England. National mapping of weight management services: provision of tier 2 and tier 3 services in England. 2015. [https://assets.publishing.service.gov.uk/government/uploads/system/uploads/attachment\\_data/file/484115/Final\\_Weight\\_Management\\_Mapping\\_Report.pdf](https://assets.publishing.service.gov.uk/government/uploads/system/uploads/attachment_data/file/484115/Final_Weight_Management_Mapping_Report.pdf) [Accessed 17 January 2020].
19. Department of Health and Social Care. Healthy Lives, Healthy People: A Call to Action on Obesity in England. 2011. <https://www.gov.uk/government/publications/healthy-lives-healthy-people-a-call-to-action-on-obesity-in-england> [Accessed April 2020].
20. Public Health England. Whole systems approach to obesity. A guide to support local approaches to promoting a healthy weight. 2019. [https://assets.publishing.service.gov.uk/government/uploads/system/uploads/attachment\\_data/file/820783/Whole\\_systems\\_approach\\_to\\_obesity\\_guide.pdf](https://assets.publishing.service.gov.uk/government/uploads/system/uploads/attachment_data/file/820783/Whole_systems_approach_to_obesity_guide.pdf) [Accessed June 2020].
21. Public Health England and NHS England. Report of the working group into: Joined up clinical pathways for obesity. 2014. <https://www.england.nhs.uk/wp-content/uploads/2014/03/owg-join-clinc-path.pdf> [Accessed April 2020].
22. Puhl RM, Heuer CA. Obesity stigma: important considerations for public health. *Am J Public Health* 2010;100:1019–28. doi: 10.2105/AJPH.2009.159491
23. Stanford FC, Tauqeer Z, Kyle TK. Media and its influence on obesity. *Curr Obes Rep* 2018;7:186–92. doi: 10.1007/s13679-018-0304-0
24. Caterson ID, Alfadda AA, Auerbach P, *et al.* Gaps to bridge: misalignment between perception, reality and actions in obesity. *Diabetes Obes Metab* 2019;21:1914–24. doi: 10.1111/dom.13752
25. Kaplan LM, Golden A, Jinnett K, *et al.* Perceptions of barriers to effective obesity care: results from the national ACTION study. *Obesity (Silver Spring)* 2018;26:61–9. doi: 10.1002/oby.22054
26. Sharma AM, Bélanger A, Carson V, *et al.* Perceptions of barriers to effective obesity management in Canada: results from the ACTION study. *Clin Obes* 2019;9:e12329. doi: 10.1111/cob.12329
27. International Society for Pharmacoepidemiology (ISPE). Guidelines for Good Pharmacoepidemiology Practices (GPP). <https://www.pharmacoepi.org/resources/policies/guidelines-08027/> [Accessed 15 January 2020].

- 1  
2  
3 28. Kyle TK, Nadglowski J, Ramos Salas X, *et al.* A comparative analysis of explicit weight bias  
4 in the UK and eight other countries. *Obes Facts* 2018;11(Suppl 1):1–364; abstract S1.3. doi:  
5 10.1159/000489691  
6
- 7 29. Carof S. Is There a ‘National Body’? How National Cultures Shape the ‘Fat’ Body and the  
8 Food Practices. *Studies in Ethnicity and Nationalism* 2017;17:57–67. doi:  
9 10.1111/sena.12219  
10
- 11 30. O’Keeffe M, Flint SW, Watts K, Rubino F. Knowledge gaps and weight stigma shape  
12 attitudes toward obesity. *Lancet Diabetes Endocrinol* 2020;8:363–365. doi: 10.1016/S2213-  
13 8587(20)30073-5  
14
- 15 31. Theis DR, White M. Is Obesity Policy in England Fit for Purpose? Analysis of Government  
16 Strategies and Policies, 1992–2020. *The Milbank Quarterly* 2021. doi: 10.1111/1468-  
17 0009.12498  
18
- 19 32. Visser F, Hiddink G, Koelen M, *et al.* Longitudinal changes in GPs’ task perceptions, self-  
20 efficacy, barriers and practices of nutrition education and treatment of overweight. *Fam*  
21 *Pract* 2008;25 Suppl 1:i105–11. doi: 10.1093/fampra/cmn078  
22
- 23 33. Tham M, Young D. The role of the General Practitioner in weight management in primary  
24 care—a cross sectional study in general practice. *BMC Fam Pract* 2008;9:66.  
25 doi: 10.1186/1471-2296-9-66  
26
- 27 34. Scott JG, Cohen D, DiCicco-Bloom B, *et al.* Speaking of weight: how patients and primary  
28 care clinicians initiate weight loss counseling. *Prev Med* 2004;38:819–27.  
29 doi: 10.1016/j.ypmed.2004.01.001  
30
- 31 35. Merrill E, Grassley J. Women’s stories of their experiences as overweight patients. *J Adv*  
32 *Nurs* 2008;64:139–46. doi: 10.1111/j.1365-2648.2008.04794.x  
33
- 34 36. Thomas SL, Hyde J, Karunaratne A, Herbert D, Komesaroff PA. Being ‘fat’ in today’s world:  
35 a qualitative study of the lived experiences of people with obesity in Australia. *Health Expect*  
36 2008;11:321–30. doi: 10.1111/j.1369-7625.2008.00490.x  
37
- 38 37. Brown HL. Providers’ familiarity with guidelines for weight gain during pregnancy impacts  
39 counseling and compliance in obese women. *J Womens Health (Larchmt)* 2017;26:1139–  
40 40. doi: 10.1089/jwh.2017.6545  
41
- 42 38. Tuthill A, Slawik H, O’Rahilly S, Finer N. Psychiatric co-morbidities in patients attending  
43 specialist obesity services in the UK. *QJM* 2006;99:317–25. doi: 10.1093/qjmed/hcl041  
44
- 45 39. Hill AJ, Williams J. Psychological health in a non-clinical sample of obese women. *Int J*  
46 *Obes Relat Metab Disord* 1998;22:578–83. doi: 10.1038/sj.ijo.0800631  
47
- 48 40. Brown I, Stride C, Psarou A, Brewins L, Thompson J. Management of obesity in primary  
49 care: nurses’ practices, beliefs and attitudes. *J Adv Nurs* 2007;59:329–41. doi:  
50 10.1111/j.1365-2648.2007.04297.x  
51
- 52 41. Leverence RR, Williams RL, Sussman A, Crabtree BF, RIOS Net Clinicians. Obesity  
53 counseling and guidelines in primary care: a qualitative study. *Am J Prev Med* 2007;32:334–  
54 39. doi: 10.1016/j.amepre.2006.12.008  
55
- 56 42. Blane DN, Macdonald S, Morrison D, O’Donnell CA. The role of primary care in adult weight  
57 management: qualitative interviews with key stakeholders in weight management services.  
58 *BMC Health Serv Res* 2017;17:764. doi: 10.1186/s12913-017-2729-7  
59  
60

- 1  
2  
3 43. Dewhurst A, Peters S, Devereux-Fitzgerald A, Hart J. Physicians' views and experiences of  
4 discussing weight management within routine clinical consultations: a thematic synthesis.  
5 *Patient Educ Couns* 2017;100:897–908. doi: 10.1016/j.pec.2016.12.017  
6
- 7 44. Henderson E. Obesity in primary care: a qualitative synthesis of patient and practitioner  
8 perspectives on roles and responsibilities. *Br J Gen Pract* 2015;65:e240–7.  
9 doi: 10.3399/bjgp15X684397  
10
- 11 45. World Health Organization (WHO). Obesity: preventing and managing the global epidemic.  
12 Report of a WHO Consultation. 2000.  
13 [https://www.who.int/nutrition/publications/obesity/WHO\\_TRS\\_894/en/](https://www.who.int/nutrition/publications/obesity/WHO_TRS_894/en/) [Accessed April 2020].  
14
- 15 46. Malterud K, Thesen J. When the helper humiliates the patient: a qualitative study about  
16 unintended intimidations. *Scand J Public Health* 2008;36:92–8. doi:  
17 10.1177/1403494807085358  
18
- 19 47. Ananthakumar T, Jones NR, Hinton L, Aveyard P. Clinical encounters about obesity:  
20 systematic review of patients' perspectives. *Clin Obes* 2020;10:e12347. doi:  
21 10.1111/cob.12347  
22
- 23 48. Speer SA, McPhillips R. Initiating discussions about weight in a non-weight-specific setting:  
24 what can we learn about the interactional consequences of different communication  
25 practices from an examination of clinical consultations? *Br J Health Psychol* 2018;23:888–  
26 907.  
27 doi: 10.1111/bjhp.12322  
28
- 29 49. Gadsby EW, Peckham S, Coleman A, *et al.* Commissioning for health improvement  
30 following the 2012 health and social care reforms in England: what has changed? *BMC*  
31 *Public Health* 2017;17:211. doi: 10.1186/s12889-017-4122-1  
32
- 33 50. McGowan BM. A practical guide to engaging individuals with obesity. *Obes Facts*  
34 2016;9:182–92. doi: 10.1159/000445193  
35
- 36 51. Martin S, Davies E, Gershlick B. Under pressure. What the Commonwealth Fund's 2015  
37 international survey of general practitioners means for the UK. 2016.  
38 <https://www.health.org.uk/sites/default/files/UnderPressure.pdf> [Accessed 1 December  
39 2019].  
40
- 41 52. Swift JA, Choi E, Puhl RM, Glazebrook C. Talking about obesity with clients: preferred terms  
42 and communication styles of U.K. pre-registration dietitians, doctors, and nurses. *Patient*  
43 *Educ Couns* 2013;91:186–91. doi: 10.1016/j.pec.2012.12.008  
44
- 45 53. Ogden J, Flanagan Z. Beliefs about the causes and solutions to obesity: a comparison of  
46 GPs and lay people. *Patient Educ Couns* 2008;71:72–8. doi: 10.1016/j.pec.2007.11.022  
47
- 48 54. Public Health England. Spend and outcome tool (SPOT). 2017.  
49 <https://www.gov.uk/government/publications/spend-and-outcome-tool-spot> [Accessed April  
50 2020].  
51
- 52 55. Public Health England. National mapping of weight management services: provision of tier 2  
53 and tier 3 services in England. 2015. [https://www.gov.uk/government/publications/weight-](https://www.gov.uk/government/publications/weight-management-services-national-mapping)  
54 [management-services-national-mapping](https://www.gov.uk/government/publications/weight-management-services-national-mapping) [Accessed 17 January 2020].  
55
- 56 56. Campbell K, Engel H, Timperio A, *et al.* Obesity management: Australian general  
57 practitioners' attitudes and practices. *Obes Res* 2000;8:459–66. doi: 10.1038/oby.2000.57  
58  
59  
60

1  
2  
3 57. Claridge R, Gray L, Stubbe M, *et al.* General practitioner opinion of weight management  
4 interventions in New Zealand. *J Prim Health Care* 2014;6:212–20.  
5  
6  
7  
8  
9  
10  
11  
12  
13  
14  
15  
16  
17  
18  
19  
20  
21  
22  
23  
24  
25  
26  
27  
28  
29  
30  
31  
32  
33  
34  
35  
36  
37  
38  
39  
40  
41  
42  
43  
44  
45  
46  
47  
48  
49  
50  
51  
52  
53  
54  
55  
56  
57  
58  
59  
60

For peer review only

Figure 1

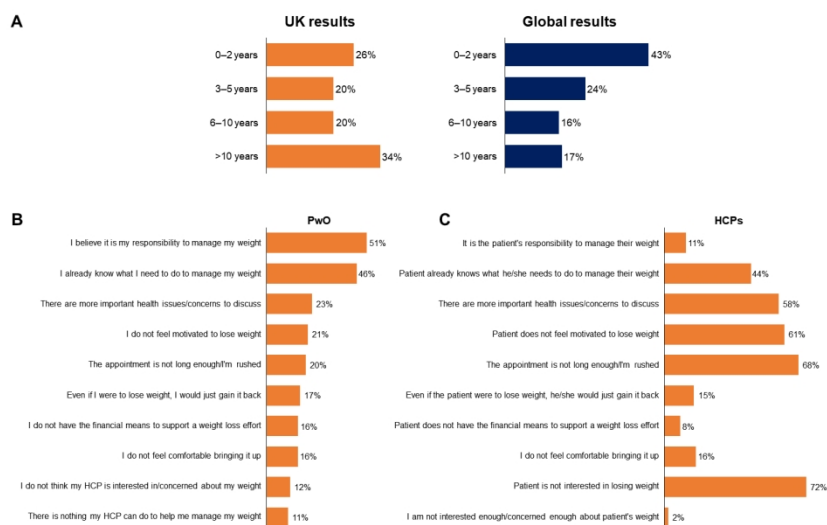

**Figure 1** Number of years between when struggle with weight began and first discussed with an HCP and PwO/HCP reasons for not discussing weight management. **(A)** Approximate number of years reported by UK and global PwO (ACTION-IO study steering committee, personal communication) between the beginning of their struggle with weight and first discussion with an HCP. Calculated at respondent level from questions “Approximately how old were you when you first remember struggling with excess weight or obesity?” and “Approximately how old were you when a healthcare provider first discussed your excess weight or recommended that you lose weight?”. **(B)** Reasons reported by UK PwO for not discussing managing their weight with an HCP. **(C)** Reasons reported by UK HCPs for not discussing weight management with their patients. HCP, healthcare professional; PwO, people with obesity.

508x304mm (96 x 96 DPI)

Figure 2

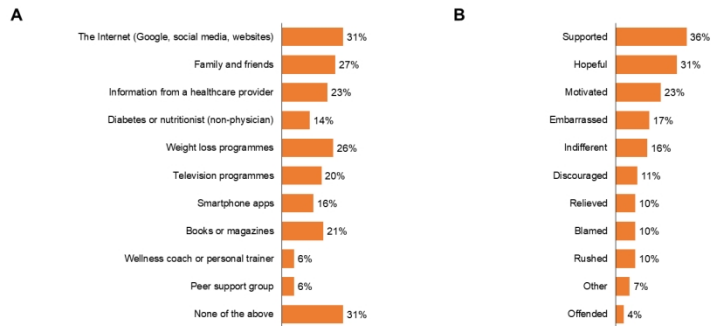

**Figure 2** Sources of information and feelings after a weight discussion. **(A)** Sources of information most frequently used by UK PwO for managing weight (reported by PwO). **(B)** Feelings reported by UK PwO after their most recent weight or weight loss discussion with an HCP in the past 5 years. HCP, healthcare professional; PwO, people with obesity.

508x304mm (96 x 96 DPI)

Figure 3

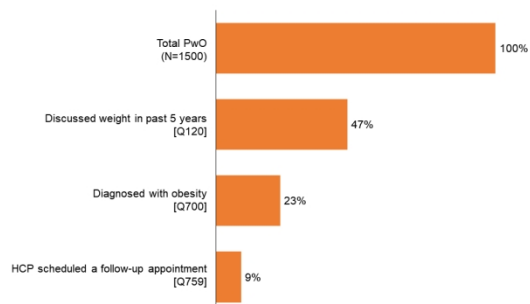

**Figure 3** Obesity diagnoses and follow-up appointments with an HCP. Proportion of UK PwO who discussed weight or weight loss with an HCP in the past 5 years and the frequency of obesity diagnoses and follow-up appointments. HCP, healthcare professional; PwO, people with obesity.

508x304mm (96 x 96 DPI)



Figure 4

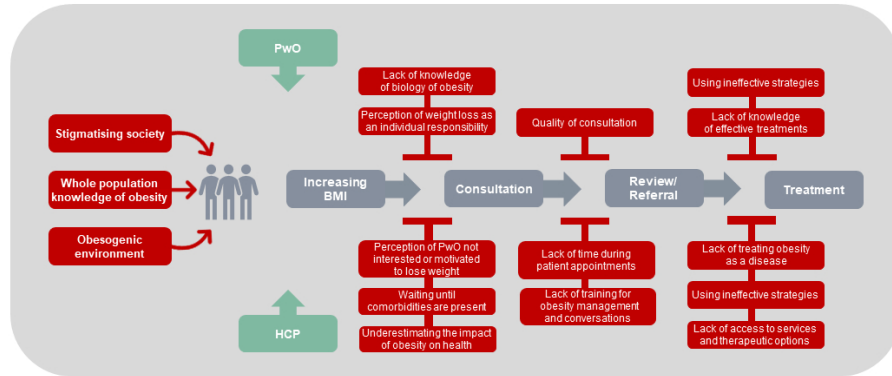

**Figure 4** A conceptual model of the obesity treatment pathway and barriers to obesity care in the UK. BMI, body mass index; HCP, healthcare professional; PwO, people with obesity.

304x203mm (96 x 96 DPI)

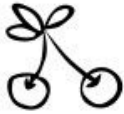

## Checklist for Reporting Results of Internet E-Surveys (CHERRIES)

| Section/Topic                                                                        | Checklist item                                                                                                                                                                                                                         | Reported on page No                                                                                                    |
|--------------------------------------------------------------------------------------|----------------------------------------------------------------------------------------------------------------------------------------------------------------------------------------------------------------------------------------|------------------------------------------------------------------------------------------------------------------------|
| Design                                                                               | Describe survey design: Describe target population, sample frame. Is the sample a convenience sample? (In "open" surveys this is most likely.)                                                                                         | 6–7                                                                                                                    |
| IRB (Institutional Review Board) approval and informed consent process               | IRB approval: Mention whether the study has been approved by an IRB.                                                                                                                                                                   | 19                                                                                                                     |
|                                                                                      | Informed consent: Describe the informed consent process. Where were the participants told the length of time of the survey, which data were stored and where and for how long, who the investigator was, and the purpose of the study? | Previously published in Caterson et al, page 3 (left column), lines 37–40 and supplement pg. 2, lines 6–9              |
|                                                                                      | Data protection: If any personal information was collected or stored, describe what mechanisms were used to protect unauthorized access.                                                                                               | Previously published in Caterson et al, supplement pg. 2, lines 30–38                                                  |
| Development and pre-testing                                                          | Development and testing: State how the survey was developed, including whether the usability and technical functionality of the electronic questionnaire had been tested before fielding the questionnaire.                            | In brief on pages 7 and 8. Previously published in detail in Caterson et al, pg. 3, lines 20–25 (left column)          |
| Recruitment process and description of the sample having access to the questionnaire | Open survey versus closed survey: An "open survey" is a survey open for each visitor of a site, while a closed survey is only open to a sample which the investigator knows (password-protected survey).                               | Previously published in Caterson et al, pg. 3, lines 30–32 (left column) and supplement pg. 2, lines 4–5 and pg 26, 27 |
|                                                                                      | Contact mode: Indicate whether or not the initial contact with the potential participants was made on the Internet. (Investigators may also send out questionnaires by mail and allow for Web-based data entry.)                       | 6                                                                                                                      |
|                                                                                      | Advertising the survey: How/where was the survey announced or advertised? Some examples are offline media (newspapers), or online (mailing lists – If yes, which ones?) or banner ads                                                  | Previously published in detail in Caterson et al,                                                                      |

|                                              |                                                                                                                                                                                                                                                                                                                                                                                                                                                                                                                                                                                        |                                                                                                       |
|----------------------------------------------|----------------------------------------------------------------------------------------------------------------------------------------------------------------------------------------------------------------------------------------------------------------------------------------------------------------------------------------------------------------------------------------------------------------------------------------------------------------------------------------------------------------------------------------------------------------------------------------|-------------------------------------------------------------------------------------------------------|
| 1<br>2<br>3                                  | (Where were these banner ads posted and what did they look like?). It is important to know the wording of the announcement as it will heavily influence who chooses to participate. Ideally the survey announcement should be published as an appendix.                                                                                                                                                                                                                                                                                                                                | supplement pg. 26, 27                                                                                 |
| 4<br>5<br>6<br>7<br>8<br>9<br>10<br>11<br>12 | Survey administration<br>Web/E-mail: State the type of e-survey (eg, one posted on a Web site, or one sent out through e-mail). If it is an e-mail survey, were the responses entered manually into a database, or was there an automatic method for capturing responses?<br><i>“Respondents were recruited via online panel companies (via e-mail) to whom they had given permission to be contacted for research purposes, and completed the survey in English. All respondents provided electronic informed consent prior to initiation of the screening questions and survey.”</i> | In brief on pg. 6.<br>Previously published in detail in Caterson et al, supplement pg. 2 lines 35, 36 |
| 13<br>14<br>15<br>16<br>17<br>18             | Context: Describe the Web site (for mailing list/newsgroup) in which the survey was posted. What is the Web site about, who is visiting it, what are visitors normally looking for? Discuss to what degree the content of the Web site could pre-select the sample or influence the results. For example, a survey about vaccination on a anti-immunization Web site will have different results from a Web survey conducted on a government Web site                                                                                                                                  | Not applicable                                                                                        |
| 19<br>20<br>21<br>22<br>23                   | Mandatory/voluntary: Was it a mandatory survey to be filled in by every visitor who wanted to enter the Web site, or was it a voluntary survey?                                                                                                                                                                                                                                                                                                                                                                                                                                        | Previously published in Caterson et al, supplement pg. 2, line 9                                      |
| 24<br>25<br>26<br>27<br>28<br>29             | Incentives: Were any incentives offered (eg, monetary, prizes, or non-monetary incentives such as an offer to provide the survey results)?                                                                                                                                                                                                                                                                                                                                                                                                                                             | Previously published in Caterson et al, pg 3, line 46 (left column) and supplement pg. 2, lines 15–17 |
| 30<br>31<br>32<br>33                         | Time/Date: In what timeframe were the data collected?<br><i>“KJT Group managed the acquisition and analysis of data; UK responses were collected between September and October 2018.”</i>                                                                                                                                                                                                                                                                                                                                                                                              | 7                                                                                                     |
| 34<br>35<br>36                               | Randomization of items or questionnaires: To prevent biases items can be randomized or alternated.                                                                                                                                                                                                                                                                                                                                                                                                                                                                                     | 7                                                                                                     |
| 37<br>38<br>39<br>40<br>41                   | Adaptive questioning: Use adaptive questioning (certain items, or only conditionally displayed based on responses to other items) to reduce number and complexity of the questions.                                                                                                                                                                                                                                                                                                                                                                                                    | Previously published in Caterson et al, supplement pg. 2, lines 26–27                                 |

|    |                |                                                                                                                                                                                                                                                                                                                                                                                                                                                                                                                   |                                                                       |
|----|----------------|-------------------------------------------------------------------------------------------------------------------------------------------------------------------------------------------------------------------------------------------------------------------------------------------------------------------------------------------------------------------------------------------------------------------------------------------------------------------------------------------------------------------|-----------------------------------------------------------------------|
| 1  |                | Number of Items: What was the number of questionnaire items per page? The number of items is an important factor for the completion rate.                                                                                                                                                                                                                                                                                                                                                                         | Previously published in Caterson et al, supplement pg. 2, lines 27–28 |
| 2  |                |                                                                                                                                                                                                                                                                                                                                                                                                                                                                                                                   |                                                                       |
| 3  |                |                                                                                                                                                                                                                                                                                                                                                                                                                                                                                                                   |                                                                       |
| 4  |                |                                                                                                                                                                                                                                                                                                                                                                                                                                                                                                                   |                                                                       |
| 5  |                | Number of screens (pages): Over how many pages was the questionnaire distributed? The number of items is an important factor for the completion rate.                                                                                                                                                                                                                                                                                                                                                             | Previously published in Caterson et al, supplement pg. 2, line 27     |
| 6  |                |                                                                                                                                                                                                                                                                                                                                                                                                                                                                                                                   |                                                                       |
| 7  |                |                                                                                                                                                                                                                                                                                                                                                                                                                                                                                                                   |                                                                       |
| 8  |                |                                                                                                                                                                                                                                                                                                                                                                                                                                                                                                                   |                                                                       |
| 9  |                | Completeness check: It is technically possible to do consistency or completeness checks before the questionnaire is submitted. Was this done, and if “yes”, how (usually JavaScript)? An alternative is to check for completeness after the questionnaire has been submitted (and highlight mandatory items). If this has been done, it should be reported. All items should provide a non-response option such as “not applicable” or “rather not say”, and selection of one response option should be enforced. | Previously published in Caterson et al, supplement pg. 2, lines 29–30 |
| 10 |                |                                                                                                                                                                                                                                                                                                                                                                                                                                                                                                                   |                                                                       |
| 11 |                |                                                                                                                                                                                                                                                                                                                                                                                                                                                                                                                   |                                                                       |
| 12 |                |                                                                                                                                                                                                                                                                                                                                                                                                                                                                                                                   |                                                                       |
| 13 |                |                                                                                                                                                                                                                                                                                                                                                                                                                                                                                                                   |                                                                       |
| 14 |                |                                                                                                                                                                                                                                                                                                                                                                                                                                                                                                                   |                                                                       |
| 15 |                |                                                                                                                                                                                                                                                                                                                                                                                                                                                                                                                   |                                                                       |
| 16 |                |                                                                                                                                                                                                                                                                                                                                                                                                                                                                                                                   |                                                                       |
| 17 |                | Review step: State whether respondents were able to review and change their answers (eg, through a Back button or a Review step which displays a summary of the responses and asks the respondents if they are correct).                                                                                                                                                                                                                                                                                          | Previously published in Caterson et al, supplement pg. 2, lines 29–30 |
| 18 |                |                                                                                                                                                                                                                                                                                                                                                                                                                                                                                                                   |                                                                       |
| 19 |                |                                                                                                                                                                                                                                                                                                                                                                                                                                                                                                                   |                                                                       |
| 20 |                |                                                                                                                                                                                                                                                                                                                                                                                                                                                                                                                   |                                                                       |
| 21 |                |                                                                                                                                                                                                                                                                                                                                                                                                                                                                                                                   |                                                                       |
| 22 | Response rates | Unique site visitor: If you provide view rates or participation rates, you need to define how you determined a unique visitor. There are different techniques available, based on IP addresses or cookies or both.                                                                                                                                                                                                                                                                                                | Previously published in Caterson et al, supplement pg. 2, lines 18–20 |
| 23 |                |                                                                                                                                                                                                                                                                                                                                                                                                                                                                                                                   |                                                                       |
| 24 |                |                                                                                                                                                                                                                                                                                                                                                                                                                                                                                                                   |                                                                       |
| 25 |                |                                                                                                                                                                                                                                                                                                                                                                                                                                                                                                                   |                                                                       |
| 26 |                |                                                                                                                                                                                                                                                                                                                                                                                                                                                                                                                   |                                                                       |
| 27 |                | View rate (Ratio of unique survey visitors/unique site visitors): Requires counting unique visitors to the first page of the survey, divided by the number of unique site visitors (not page views!). It is not unusual to have view rates of less than 0.1 % if the survey is voluntary.<br><i>“The response rate to the survey was 14% for PwO and 35% for HCPs”</i>                                                                                                                                            | 8                                                                     |
| 28 |                |                                                                                                                                                                                                                                                                                                                                                                                                                                                                                                                   |                                                                       |
| 29 |                |                                                                                                                                                                                                                                                                                                                                                                                                                                                                                                                   |                                                                       |
| 30 |                |                                                                                                                                                                                                                                                                                                                                                                                                                                                                                                                   |                                                                       |
| 31 |                |                                                                                                                                                                                                                                                                                                                                                                                                                                                                                                                   |                                                                       |
| 32 |                | Participation rate (Ratio of unique visitors who agreed to participate/unique first survey page visitors): Count the unique number of people who filled in the first survey page (or agreed to participate, for example by checking a checkbox), divided by visitors who visit the first page of the survey (or the informed consents page, if present). This can also be called “recruitment” rate.                                                                                                              | 9 (Table 1 footnotes)                                                 |
| 33 |                |                                                                                                                                                                                                                                                                                                                                                                                                                                                                                                                   |                                                                       |
| 34 |                |                                                                                                                                                                                                                                                                                                                                                                                                                                                                                                                   |                                                                       |
| 35 |                |                                                                                                                                                                                                                                                                                                                                                                                                                                                                                                                   |                                                                       |
| 36 |                |                                                                                                                                                                                                                                                                                                                                                                                                                                                                                                                   |                                                                       |
| 37 |                | Completion rate (Ratio of users who finished the survey/users who agreed to participate): The number of people submitting the last questionnaire page, divided by the number of people who agreed to participate (or submitted the first survey page). This is only relevant if there is a separate “informed consent” page or if the survey goes over several pages. This is a measure                                                                                                                           | 9 (Table 1 footnotes)                                                 |
| 38 |                |                                                                                                                                                                                                                                                                                                                                                                                                                                                                                                                   |                                                                       |
| 39 |                |                                                                                                                                                                                                                                                                                                                                                                                                                                                                                                                   |                                                                       |
| 40 |                |                                                                                                                                                                                                                                                                                                                                                                                                                                                                                                                   |                                                                       |
| 41 |                |                                                                                                                                                                                                                                                                                                                                                                                                                                                                                                                   |                                                                       |
| 42 |                |                                                                                                                                                                                                                                                                                                                                                                                                                                                                                                                   |                                                                       |

1  
2  
3  
4  
5  
6  
7  
8  
9  
10  
11  
12  
13  
14  
15  
16  
17  
18  
19  
20  
21  
22  
23  
24  
25  
26  
27  
28  
29  
30  
31  
32  
33  
34  
35  
36  
37  
38  
39  
40  
41  
42  
43  
44  
45  
46

|                                                      |                                                                                                                                                                                                                                                                                                                                                                                                                                                                                                                                                                                      |                                                                                                       |
|------------------------------------------------------|--------------------------------------------------------------------------------------------------------------------------------------------------------------------------------------------------------------------------------------------------------------------------------------------------------------------------------------------------------------------------------------------------------------------------------------------------------------------------------------------------------------------------------------------------------------------------------------|-------------------------------------------------------------------------------------------------------|
|                                                      | for attrition. Note that “completion” can involve leaving questionnaire items blank. This is not a measure for how completely questionnaires were filled in. (If you need a measure for this, use the word “completeness rate”.)                                                                                                                                                                                                                                                                                                                                                     |                                                                                                       |
| Preventing multiple entries from the same individual | Cookies used: Indicate whether cookies were used to assign a unique user identifier to each client computer. If so, mention the page on which the cookie was set and read, and how long the cookie was valid. Were duplicate entries avoided by preventing users access to the survey twice; or were duplicate database entries having the same user ID eliminated before analysis? In the latter case, which entries were kept for analysis (eg, the first entry or the most recent)?                                                                                               | In brief on pg. 7.<br>Previously published in detail in Caterson et al, supplement pg. 2, lines 18–23 |
|                                                      | IP check: Indicate whether the IP address of the client computer was used to identify potential duplicate entries from the same user. If so, mention the period of time for which no two entries from the same IP address were allowed (eg, 24 hours). Were duplicate entries avoided by preventing users with the same IP address access to the survey twice; or were duplicate database entries having the same IP address within a given period of time eliminated before analysis? If the latter, which entries were kept for analysis (eg, the first entry or the most recent)? | In brief on pg. 7.<br>Previously published in detail in Caterson et al, supplement pg. 2, lines 18–23 |
|                                                      | Log file analysis: Indicate whether other techniques to analyze the log file for identification of multiple entries were used. If so, please describe.                                                                                                                                                                                                                                                                                                                                                                                                                               | Not applicable                                                                                        |
|                                                      | Registration: In “closed” (non-open) surveys, users need to login first and it is easier to prevent duplicate entries from the same user. Describe how this was done. For example, was the survey never displayed a second time once the user had filled it in, or was the username stored together with the survey results and later eliminated? If the latter, which entries were kept for analysis (eg, the first entry or the most recent)?                                                                                                                                      | In brief on pg. 7<br>Additional details published in Caterson et al, supplement pg. 2, lines 18–23    |
| Analysis                                             | Handling of incomplete questionnaires: Were only completed questionnaires analyzed? Were questionnaires which terminated early (where, for example, users did not go through all questionnaire pages) also analyzed?                                                                                                                                                                                                                                                                                                                                                                 | Published previously in Caterson et al, supplement pg. 2, lines 28–30                                 |
|                                                      | Questionnaire submitted with an atypical timestamp: Some investigators may measure the time people needed to fill in a questionnaire and exclude questionnaires that were submitted too soon. Specify the timeframe that was used as a cut-off point, and describe how this point was determined.                                                                                                                                                                                                                                                                                    | Previously published in Caterson et al, supplement pg. 3, lines 27–31                                 |
|                                                      | Statistical correction: Indicate whether any methods such as weighting of items or propensity scores have been used to adjust for the non-representative sample; if so, please describe the methods.                                                                                                                                                                                                                                                                                                                                                                                 | In brief on page 7.<br>Previously published in detail in Caterson et al,                              |

|  |  |                                 |
|--|--|---------------------------------|
|  |  | supplement pg. 4, lines<br>4–16 |
|--|--|---------------------------------|

1  
2  
3  
4 Caterson ID, Alfadda AA, Auerbach P, et al. Gaps to bridge: misalignment between perception, reality and actions in obesity. *Diabetes Obes Metab* 2019;21:1914-1924.  
5  
6  
7  
8  
9  
10  
11  
12  
13  
14  
15  
16  
17  
18  
19  
20  
21  
22  
23  
24  
25  
26  
27  
28  
29  
30  
31  
32  
33  
34  
35  
36  
37  
38  
39  
40  
41  
42

For peer review only
